# Supplementary material for: Structural determinants of food insufficiency, low dietary diversity and BMI: a cross-sectional study of HIV-infected and HIV-negative Rwandan women
Source: PubMed Central journal article supplement — BMJ Open. 2012 Apr 13;2(2):e000714. doi: 10.1136/bmjopen-2011-000714 (PMC3329607; doi:10.1136/bmjopen-2011-000714), 2012-04-13
Supplement: bmjopen-2011-000714.draft_revisions.pdf [file bmjopen-2011-000714.draft_revisions.pdf]

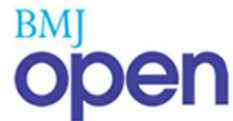

**Structural Determinants of Food Insufficiency and Low Dietary Diversity: A Cross Sectional Study of HIV-positive Rwandan Women**

|                                 |                                                                                                                                                                                                                                                                                                                                                                                                                                                                                                                                                                                                                                                                                                                                                                                                                            |
|---------------------------------|----------------------------------------------------------------------------------------------------------------------------------------------------------------------------------------------------------------------------------------------------------------------------------------------------------------------------------------------------------------------------------------------------------------------------------------------------------------------------------------------------------------------------------------------------------------------------------------------------------------------------------------------------------------------------------------------------------------------------------------------------------------------------------------------------------------------------|
| Journal:                        | <i>BMJ Open</i>                                                                                                                                                                                                                                                                                                                                                                                                                                                                                                                                                                                                                                                                                                                                                                                                            |
| Manuscript ID:                  | bmjopen-2011-000714                                                                                                                                                                                                                                                                                                                                                                                                                                                                                                                                                                                                                                                                                                                                                                                                        |
| Article Type:                   | Research                                                                                                                                                                                                                                                                                                                                                                                                                                                                                                                                                                                                                                                                                                                                                                                                                   |
| Date Submitted by the Author:   | 07-Dec-2011                                                                                                                                                                                                                                                                                                                                                                                                                                                                                                                                                                                                                                                                                                                                                                                                                |
| Complete List of Authors:       | Sirotin, Nicole; Weill Cornell Medical College, Department of Medicine<br>Hoover, Donald; Institute for Health, Health Care Policy and Aging Research, Rutgers University, Department of Statistics and Biostatistics<br>Segal-Isaacson, CJ; Albert Einstein College of Medicine, Department of Epidemiology & Population Health<br>Shi, Qiuhu; New York Medical College, Department of Epidemiology and Community Health<br>Adedimeji, Adebola; Albert Einstein College of Medicine, Department of Epidemiology & Population Health<br>Mutimura, Eugene; Women's Equity in Access to Care and Treatment, Cohen, Mardge; Rush University and John Stroger (formerly Cook County) Hospital, Department of Medicine<br>Anastos, Kathryn; Albert Einstein College of Medicine, Department of Epidemiology & Population Health |
| <b>Primary Subject Heading</b>: | Global health                                                                                                                                                                                                                                                                                                                                                                                                                                                                                                                                                                                                                                                                                                                                                                                                              |
| Secondary Subject Heading:      | Infectious diseases                                                                                                                                                                                                                                                                                                                                                                                                                                                                                                                                                                                                                                                                                                                                                                                                        |
| Keywords:                       | HIV & AIDS < INFECTIOUS DISEASES, Nutrition < TROPICAL MEDICINE, SOCIAL MEDICINE                                                                                                                                                                                                                                                                                                                                                                                                                                                                                                                                                                                                                                                                                                                                           |
|                                 |                                                                                                                                                                                                                                                                                                                                                                                                                                                                                                                                                                                                                                                                                                                                                                                                                            |

SCHOLARONE™  
Manuscripts

1  
2  
3  
4  
5  
6  
7  
8  
9  
10  
11  
12  
13  
14  
15  
16  
17  
18  
19  
20  
21  
22  
23  
24  
25  
26  
27  
28  
29  
30  
31  
32  
33  
34  
35  
36  
37  
38  
39  
40  
41  
42  
43  
44  
45  
46  
47  
48  
49  
50  
51  
52  
53  
54  
55  
56  
57  
58  
59  
60

## Structural Determinants of Food Insufficiency and Low Dietary Diversity a Cross Sectional Study of HIV-positive Rwandan Women

Nicole Sirotin, Donald R Hoover, CJ Segal-Isaacson, Qiuhu Shi, Adebola Adedimeji, Eugene Mutimura, Mardge Cohen, Kathryn Anastos\*

Nicole Sirotin, MD, Assistant Professor, Department of Medicine, Weill Cornell Medical College, New York, New York, Donald R Hoover, PhD, Professor, Department of Statistics and Biostatistics, and Institute for Health, Health Care Policy and Aging Research, Rutgers University, New Brunswick, New Jersey, CJ Segal-Isaacson, EdD, Assistant Clinical Professor, Department of Epidemiology and Population Health, Albert Einstein College of Medicine, Bronx, New York, Qiuhu Shi, PhD, Professor, Epidemiology and Community Health, New York Medical College, Valhalla, New York., Adebola Adedimeji, PhD, Assistant Professor Department of Epidemiology and Population Health, Albert Einstein College of Medicine, Bronx, New York, Eugene Mutimura, PhD, Women's Equity in Access to Care and Treatment, Kigali, Rwanda, Mardge Cohen, MD, Professor, Department of Medicine, John Stroger (formerly Cook County) Hospital and Rush University, Chicago, Illinois, Kathryn Anastos, MD, Professor Departments of Medicine and Epidemiology and Population Health, Montefiore Medical Center and Albert Einstein College of Medicine, Bronx, New York.

Correspondence to: Nicole Sirotin, MD, 505 East 70<sup>th</sup> St, Helmsley Tower, 4<sup>th</sup> Floor, New York, NY 10021, Phone (212)746-5858, Fax(212) 746-0405, email: nis9066@cornell.med.edu.

### Contributorship

K.A., E.M. and C.S. designed the research. N.S., Q.S., D.H., C.S. and K.A. analyzed the data. N.S. wrote the paper with input from all authors. N.S. had primary responsibility for the final content. All authors read and approved the final manuscript.

1  
2 KEY WORDS: HIV, poverty, nutrition, international health  
3

4 WORD COUNT: 2417. NUMBER OF FIGURES: 0. NUMBER OF TABLES: 3.  
5

6 SUPPLEMENTARY MATERIAL: Online Supporting Material: 0.  
7  
8  
9  
10  
11  
12  
13  
14  
15  
16  
17  
18  
19  
20  
21  
22  
23  
24  
25  
26  
27  
28  
29  
30  
31  
32  
33  
34  
35  
36  
37  
38  
39  
40  
41  
42  
43  
44  
45  
46  
47  
48  
49  
50  
51  
52  
53  
54  
55  
56  
57  
58  
59  
60

For peer review only

1  
2  
3 1 Article Summary:  
4

5  
6 2 1) Article Focus

- 7  
8 3 a. What structural determinants are associated with food insufficiency, low  
9 4 dietary diversity and low BMI in HIV-infected women in Rwanda?  
10  
11 5 b. What is the prevalence of food insufficiency, low dietary diversity and  
12 6 low BMI in HIV-infected women in Rwanda and are they correlated with  
13 7 each other?  
14  
15 8 c. Hypotheses  
16  
17 9 i. #1: Poverty, low educational status and alcohol use would be  
18 10 associated with food insufficiency, low dietary diversity and low  
19 11 BMI.  
20 12 ii. #2 food insufficiency, low dietary diversity and low BMI would be  
21 13 highly prevalent and would be correlated with one another.  
22  
23  
24  
25  
26

27 14 2) Key messages

- 28  
29 15 a. Food insufficiency was found in 44% of the population and was  
30 16 associated with low income and illiteracy and was strongly associated  
31 17 with alcohol use.  
32  
33 18 b. BMI (body mass index, kg/m<sup>2</sup>) was not correlated with food insufficiency  
34 19 or dietary diversity.  
35  
36 20 c. Significance: Food Insufficiency is highly prevalent in HIV-infected  
37 21 women in Rwanda. Extreme poverty, low literacy and alcohol use may  
38 22 useful indicators of food insufficiency in this population. Low BMI is not  
39 23 an adequate screening tool for food insufficiency in HIV-infected  
40 24 populations  
41  
42  
43  
44  
45

46 25 3) Strengths and limitations

- 47  
48 26 a. Strengths: Large cohort of HIV-infected women, very detailed tools  
49 27 used for food insufficiency and dietary diversity  
50  
51 28 b. Limitations: Cross sectional design, our measurement of food  
52 29 insufficiency is solely by self report.  
53  
54  
55  
56  
57  
58  
59  
60

## 32 Abstract

33 Objectives: Food insufficiency, low dietary diversity and low BMI affect millions of  
34 people worldwide and have negative effects on health. We sought to determine  
35 which structural factors are associated with food insufficiency, low dietary diversity  
36 and low BMI in HIV-infected Sub-Saharan women. We hypothesized that poverty,  
37 low education and alcohol use would be associated with food insufficiency, low  
38 dietary diversity and low BMI. We also hypothesized that food insufficiency would be  
39 correlated with low dietary diversity and low BMI.

40 Study Design: cross-sectional analysis of a longitudinal cohort

41 Setting: Community-based women's organizations and clinical care sites for HIV-  
42 infected patients in Rwanda

43 Participants: 622 HIV-infected women

44 Primary and secondary outcome measures: We measured structural and behavioral  
45 factors of HIV-infected women including: income, literacy, education level, electricity,  
46 and alcohol use. We also assessed for food insufficiency, household dietary diversity  
47 and body mass index.

48 Results: Poverty and illiteracy were common (35% and 23%, respectively). Food  
49 insufficiency was prevalent with 44% of women reporting "usually not" or "never" to  
50 "Do you have enough food?" Food insufficiency was associated with low income  
51 (adjusted Odds Ratio (aOR)=2.57), unemployment, (aOR=1.92) and illiteracy  
52 (aOR=1.74). Alcohol use was strongly associated with being food insufficient  
53 (aOR=4.89). Factors associated with low dietary diversity included low income  
54 (aOR=8.72) and illiteracy (aOR=2.25). BMI (body mass index, kg/m<sup>2</sup>) was not  
55 correlated with food insufficiency or dietary diversity, suggesting that low BMI in these

1  
2 56 women may not result from food insufficiency alone.  
3

4 57 Conclusions: HIV-infected Rwandan women experienced high rates of food  
5  
6 58 insufficiency and low dietary diversity. HIV treatment programs in developing  
7  
8 59 countries may consider extreme poverty, unemployment, illiteracy and alcohol use as  
9  
10 60 indications to screen for and address food insufficiency and dietary diversity in HIV-  
11  
12 61 infected populations. Additionally, low BMI is not an adequate screening tool for food  
13  
14 62 insufficiency in HIV-infected populations.  
15  
16  
17  
18  
19  
20  
21  
22  
23  
24  
25  
26  
27  
28  
29  
30  
31  
32  
33  
34  
35  
36  
37  
38  
39  
40  
41  
42  
43  
44  
45  
46  
47  
48  
49  
50  
51  
52  
53  
54  
55  
56  
57  
58  
59  
60

## 65 INTRODUCTION

66 Food insecurity, including insufficient access to adequate, safe, nutritionally diverse  
67 food, affects an estimated 800 million people worldwide[1,2] In HIV-infected  
68 individuals, food insufficiency and low dietary diversity are associated with poor  
69 health[3-5]. Food insufficiency may be caused by structural factors: social, political,  
70 economic structures or institutions that affect people's ability to control the conditions  
71 of their lives and meet their basic needs. Structural determinants of health include  
72 distribution of wealth, power and goods, access to education and schools, access to  
73 health care, and housing and environment conditions. These structural determinants  
74 play a major role in health inequities and greatly affect health status [6]  
75 But structural factors associated with food insufficiency in HIV-infected Sub-Saharan  
76 women, and how such factors may be addressed to mitigate food insufficiency in the  
77 region is not well studied.

78 Food insufficiency (lack of adequate food to meet daily needs) is one aspect of  
79 food insecurity, a complex phenomenon describing lack of access to sufficient  
80 quantity and adequate quality of food, and anxiety in procuring food [2]. Over half of  
81 all households in Rwanda are thought to be food insecure, many of which are  
82 headed by women [7]. Rwanda has a significant number of female headed  
83 households (31%), partly due to the high numbers of genocide-related widows, and  
84 62% of female headed households live in poverty, compared to 54% of male-headed  
85 households[8]. Especially in vulnerable populations, such as HIV-infected women,  
86 gender disparities may prevent women from having control of family resources and  
87 the discretionary income necessary for buying food [9]

1  
2 88 In HIV-infected women, food insufficiency may result in low body mass index  
3  
4 89 (BMI), which adversely affects health outcomes [10]. In addition, consuming fewer  
5  
6 90 distinct food groups or low dietary diversity, which contributes to poor health  
7  
8  
9 91 outcomes in African women and children [4], may reinforce malnutrition and  
10  
11 92 eventually result in poor health [11]. Many African diets consist of a single dominant  
12  
13 93 carbohydrate group, such as cassava, potato or yam which provides calories that  
14  
15 94 may maintain body weight, but often does not provide the micro and macronutrients  
16  
17 95 needed for proper immune function[12] .  
18  
19

20  
21 96 In HIV+ patients, food insecurity has been associated with low CD4 counts,  
22  
23 97 virologic failure and increased mortality[3,5] . Low BMI (<18.5 kg/m<sup>2</sup>) is a strong  
24  
25 98 predictor for mortality in HIV+ patients starting ART, with higher mortality in patients  
26  
27 99 who are both food insecure and underweight versus underweight but food secure[5] .  
28  
29 100 Although poverty is associated with poor health outcomes, income alone does not  
30  
31 101 always reflect the status of someone's "wealth." In populations with very low  
32  
33 102 incomes, markers for disposable or discretionary income, defined as income after all  
34  
35 103 essential items are paid for, may be more useful to define an individual's  
36  
37 104 socioeconomic status. These may include access to electricity and ability to buy non-  
38  
39 105 essential items such as alcohol. For women with HIV, it is unclear which structural  
40  
41 106 factors most influence food insecurity, and therefore have the greatest impact on  
42  
43 107 health outcomes.  
44  
45  
46  
47

48  
49 108 In order to understand structural determinants of food insufficiency and  
50  
51 109 elucidate potential interventions to prevent food insufficiency and malnutrition in HIV+  
52  
53 110 Rwandan women, we examined the prevalence and socio-demographic associations  
54  
55 111 of food insufficiency and household dietary diversity in HIV+ women in Rwanda. We  
56  
57  
58  
59  
60



1  
2 112 further examined the relationship between food insufficiency, low BMI and low dietary  
3  
4 113 diversity in these women.  
5  
6  
7 114

## 9 115 **METHODS**

10  
11 116 Population and Setting: The Rwanda Women's Interassociation Study and  
12  
13  
14 117 Assessment (RWISA) (described in detail elsewhere [13]) is a prospective  
15  
16 118 observational cohort designed to assess the effectiveness and toxicity of antiretroviral  
17  
18 119 therapy (ART) in HIV-infected Rwandan women. In 2005, 710 HIV-infected and 226  
19  
20  
21 120 HIV-uninfected Rwandan women were recruited through community-based women's  
22  
23 121 organizations and clinical care sites for HIV-infected patients. Eligible women were  
24  
25 122 25 years or older at study entry and willing to give informed consent. HIV-infected  
26  
27  
28 123 women were excluded if they had prior history of receiving antiretroviral treatment,  
29  
30 124 except possibly single dose nevirapine to prevent mother to infant transmission of  
31  
32  
33 125 HIV. Women were compensated 2500 Rwandan francs for each visit. The Rwandan  
34  
35 126 National Ethics Committee and the Institutional Review Board at Montefiore Medical  
36  
37 127 Center approved this study.

38  
39  
40 128 At each study visit participants provided historical information. Trained  
41  
42 129 research assistants collected socio-demographic data at study entry including age,  
43  
44 130 income, education, literacy level, education, employment, access to electricity and  
45  
46  
47 131 alcohol use. At each visit participants had a focused physical examination and  
48  
49 132 provided blood specimens for CD4 lymphocyte and complete blood counts. Standing  
50  
51 133 height and weight were measured while the participant was wearing light clothing and  
52  
53  
54 134 no shoes. This analysis included all 622 HIV-positive women who completed socio-

1  
2 135 demographic and nutritional data at the fifth semi-annual visit, between July and  
3  
4 136 December 2007.

5  
6  
7 137 Measures:

8  
9 138 *Outcomes:* Between July and December 2007, food insufficiency was assessed  
10  
11 139 using a single question, “Do you have enough food?” with the women answering  
12  
13 140 “usually not” or “never” classified as food insecure [14,15]. Household dietary  
14  
15 141 diversity was assessed using a modified Household Dietary Diversity Score (HDDS),  
16  
17 142 a validated tool measuring household food consumption over the previous 24 hours,  
18  
19 143 giving one point for each food class (total 6 possible: 1) cereals and roots; 2)  
20  
21 144 vegetables; 3) fruits; 4) meat protein [including meat, eggs, fish]; 5) vegetable protein  
22  
23 145 [including legumes, beans, nuts]; 6) extras [including oil, fat, sugar, condiments]).  
24  
25 146 Determination of “Low household dietary diversity” is described in detail elsewhere,  
26  
27 147 [18] briefly, the sample was divided into income terciles with the mean HDDS for the  
28  
29 148 lowest income tercile ( $\leq 3$ ) representing low dietary diversity [12,16,17].

30  
31 149 Independent variables: Income categories were defined as 1) >35,000 Rwandan  
32  
33 150 Francs (\$US 58), 2) 35,000-10,000, and 3) <10,000 RWF (\$US 17), per month.

34  
35 151 Electricity and alcohol were dichotomous variables with the presence of electricity in  
36  
37 152 the participant’s home used as a proxy for the measurement of disposable income  
38  
39 153 Alcohol use was queried as “Since the last visit have you had a drink containing  
40  
41 154 alcohol?” Education was dichotomized to none vs. some (including some primary,  
42  
43 155 completed primary and some secondary) for the analysis. Literacy was defined as  
44  
45 156 “can read all, most, some or none,” and for the analysis was dichotomized to none  
46  
47 157 vs. some, most or all. Employment was assessed with “Are you currently employed?”  
48  
49 158 Antiretroviral use was assessed by self-report with verification of date of initiation and  
50  
51  
52  
53  
54  
55  
56  
57  
58  
59  
60

1  
2 159 regimen by tracking cards provided to the participants by providers in the national  
3  
4 160 treatment program. CD4 counts were determined with a FACS counter (Becton and  
5  
6  
7 161 Dickinson, Immunocytometry Systems, San Jose, CA, USA).

8  
9 162 Data Analysis:

10  
11 163 BMI was calculated using weight divided by height-squared ( $\text{kg}/\text{m}^2$ ) and dichotomized  
12  
13  
14 164 to  $\leq 18.5$  or  $> 18.5$  for the analysis. Statistical analysis was performed using SAS  
15  
16 165 (version 9.1.3, SAS Institute Inc., Cary, NC, USA). Univariate logistic regression  
17  
18 166 identified factors associated with food insecurity, low dietary diversity, and BMI.  
19  
20 167 Multivariate logistic regression models were built using backward selection with a p-  
21  
22 168 value of 0.05 to stay in the model. Wilcoxon rank sum and Kappa statistics assessed  
23  
24 169 relationships between food insecurity, BMI and dietary diversity as continuous  
25  
26 170 variables and as dichotomous variables (food insecurity= answering “usually not” or  
27  
28 171 “never” to “Do you have enough food”, HDDS $\leq 3$ , BMI  $\leq 18.5$ ), respectively.  
29  
30  
31  
32

33 172

34  
35 173 **RESULTS**

36  
37 174 The prevalence of poverty was high among the 622 women who met inclusion  
38  
39 175 criteria; 35% reported a monthly income of less than <10K Rwandan Francs (FRW)  
40  
41 176 (\$US 17). Illiteracy was as high as 23%, and 22% of women reported no formal  
42  
43 177 education (Table 1). Mean CD4 counts among HIV positive women at Visit 5 were  
44  
45 178 <350 cells/ $\mu\text{l}$  in 53%; 70% of participants took antiretroviral therapy at this visit.

46  
47  
48  
49 179 Food insufficiency (Table 1) was highly prevalent with 44% of women reporting  
50  
51 180 “usually not” or “never” to “Do you have enough food?” and another 45% reporting  
52  
53 181 they “sometimes” did not have enough food. Almost half the population reported low  
54  
55  
56  
57  
58  
59  
60

1  
2 182 dietary diversity (HDDS <3) and 12% of women met WHO criteria for malnutrition  
3  
4 183 with a BMI<18.5 kg/m<sup>2</sup>.

5  
6 184 In unadjusted analyses (Table 2), structural factors associated with food  
7  
8 185 insufficiency included income <10,000 FRW (OR=2.96; CI 1.67-5.27), income  
9  
10 186 >35,000 FRW vs. <10,000 FRW (OR=1.76; CI 1.01-3.07), no education (OR=2.02; CI  
11  
12 187 1.05-3.88), illiteracy [(can read none: OR= 2.06; CI 1.29-3.30), (can read some:  
13  
14 188 OR=1.48; CI 0.99-2.21)], unemployment (OR 1.99; CI 1.19-3.34), and alcohol use  
15  
16 189 (OR=3.76; CI 2.08-6.78). Factors associated with low dietary diversity (HDDS<3)  
17  
18 190 were income [(income <10,000 FRW: OR= 10.14;CI 4.90-21.01), ],( income >35,000  
19  
20 191 FRW vs. <10,000 FRW: OR=4.16; CI 2.04-8.46), education [(none: OR=3.42; CI 1.70-  
21  
22 192 6.78), (some primary: OR =2.30; CI 1.19-4.42), illiteracy [(none: OR= 2.90; CI 1.79-  
23  
24 193 4.86) (some: OR=1.72; CI 1.14-2.59)], and unemployment (OR=2.13; CI 1.26-3.61).  
25  
26 194 No variables had statistically significant (P < 0.05) associations with BMI.  
27  
28  
29  
30  
31  
32

33 195 In the final stepwise multivariate model, food insufficiency was independently  
34  
35 196 associated with low income {Adjusted Odds ratio (aOR) 2.57; 95% CI 1.39-4.74 for  
36  
37 197 >35,000 FRW vs. <10,000 FRW}, unemployment (aOR=1.92; CI 1.09-3.38) and  
38  
39 198 illiteracy (aOR=1.74; CI 1.06-2.85) (Table 2). Alcohol use (none vs. any use) was  
40  
41 199 strongly independently associated with being food insecure (aOR=4.89; CI 2.57-  
42  
43 200 9.29). Factors independently associated with low dietary diversity (HDDS <3.0)  
44  
45 201 included low monthly income (aOR=8.72; CI 4.18-18.2 for income <10,000  
46  
47 202 vs. >35,000 FRW and aOR=3.77; CI 1.84-7.71 for income 10,000-35,000 FRW  
48  
49 203 vs. >35,000 FRW) and illiteracy (aOR=2.25, CI 1.36-3.71).  
50  
51  
52  
53

54 204 When analyzed as continuous variables, no significant correlations were found  
55  
56 205 between self-reported food insufficiency and BMI (r=-0.05, p=0.29). A statistically  
57  
58  
59  
60

1  
2 206 significant but weak correlation was found between between dietary diversity and  
3  
4 207 BMI  $r=0.09$ ,  $p=0.03$  and food insufficiency and dietary diversity:  $r=0.14$ ,  $p<0.001$ .  
5  
6 208 When analyzed as dichotomous variables, no significant correlations were found  
7  
8 209 between food insufficiency and BMI, Kappa (K) =0.02, dietary diversity and BMI,  
9  
10 210 K=0.02 or food insufficiency and dietary diversity, K=0.12.  
11  
12  
13  
14  
15  
16  
17  
18  
19  
20  
21  
22  
23  
24  
25  
26  
27  
28  
29  
30  
31  
32  
33  
34  
35  
36  
37  
38  
39  
40  
41

## 212 **DISCUSSION**

213 While HIV-infected Rwandan women experienced high rates of food insufficiency  
214 (42.1%) and low dietary diversity (44.4%), only 12% of the women had low BMI.  
215 Furthermore neither food insufficiency nor lack of dietary diversity was associated  
216 with BMI, suggesting that low BMI in these women was not resulting from food  
217 insufficiency alone. Still body weight may be maintainable on a low nutrient density  
218 starchy diet that includes suboptimal protein and micronutrient consumption.

219 Structural factors including low income, illiteracy, and behavioral factors such as  
220 alcohol use, were associated with food insufficiency and low dietary diversity. Our  
221 findings highlight three important aspects useful in designing interventions to prevent  
222 food insufficiency in vulnerable populations.

223 First, the few women had low BMI (12%), while almost half were either food  
224 insufficient or had low dietary diversity. Additionally, BMI was not correlated with self-  
225 reported food insufficiency or dietary diversity. Because of the known health effects  
226 of food insufficiency and low dietary diversity, separate from BMI [3,5,11], our results  
227 support that BMI should not be considered as a sole marker for food insufficiency in  
228 HIV-infected women. The weak association between self-reported food insufficiency  
229 and dietary diversity may reflect an inexpensive, abundant single food group, such as

1  
2 230 potatoes or cassava root, common in Rwanda, that provide a sufficient yet minimally  
3  
4 231 diverse diet. Additionally, if that single food group is cassava, it provides a much  
5  
6 232 lower protein and micronutrient source than potato, yams or rice.  
7  
8

9 233 Second, women who had incomes of <\$17 per month (equal to 10,000 RWF per  
10  
11 234 month) or were unemployed were more likely to be food insecure when compared  
12  
13 235 with women whose incomes were >\$60 monthly (equal to 35,000 RWF per month).  
14  
15 236 The World Bank defines extreme poverty as <\$1.25/ day (~\$37/month) and moderate  
16  
17 237 poverty at <\$2/day (~\$60/month): significant differences exist in health outcomes for  
18  
19 238 these two groups[18] . This highlights a potentially important target for both ministries  
20  
21 239 of health and international aid organizations and is consistent with the Millennium  
22  
23 240 Development Goals to eradicate poverty[19] . HIV-infected women whose income is  
24  
25 241 less than \$1.25/day may benefit from income supplementation programs to help  
26  
27 242 prevent food insufficiency[20]. Alternatively, poverty reduction strategies, or job skills  
28  
29 243 training programs, may be beneficial public health interventions for these women [21-  
30  
31 244 23].  
32  
33  
34  
35  
36

37 245 Luxury items, such as alcohol, can be used as a marker for disposable income  
38  
39 246 [24]. In our analysis, alcohol use was associated with higher rates of food  
40  
41 247 insufficiency suggesting it reflected diversion of disposable income from food to  
42  
43 248 alcohol. Data on alcohol misuse in Rwandan women are limited, with an estimated  
44  
45 249 national pure alcohol use of 4.3 L per capita [25]; alcohol use may represent a  
46  
47 250 valuable screening tool for food insufficiency in HIV+ women. Alcohol also serves as  
48  
49 251 a predictor of inconsistent condom use in African women, further support that it  
50  
51 252 represents an important point of intervention[14].  
52  
53  
54  
55  
56  
57  
58  
59  
60

1  
2 253 Lastly, we found that illiteracy was independently associated with greater food  
3  
4 254 insufficiency and low dietary diversity. This may be because low literacy is an  
5  
6 255 important aspect of “income generating capacity,” which is critical to ability to obtain  
7  
8  
9 256 relevant dietary diversity and food security. Gender differences in educational and  
10  
11 257 literacy attainment in Rwanda may lead to men procuring non-farm jobs with  
12  
13  
14 258 increased income potential which may increase the numbers of women left to  
15  
16 259 manage the family agricultural plots[26]. Further studies need to be done to  
17  
18 260 determine if literacy programs would benefit the level of food security and health  
19  
20  
21 261 status of HIV+ women. Improving land reform laws in Rwanda that strengthen  
22  
23 262 women’s positions to own and farm their own land, and empower them with  
24  
25 263 alternative farming techniques, may increase their food security in both urban and  
26  
27  
28 264 rural areas[27-29].

29  
30 265 Limitations of our study include its cross-sectional nature, which does not allow us  
31  
32 266 to infer causality. Our measurement of food insufficiency is solely by self report. The  
33  
34 267 question, “Do you have enough food?” does not address the quantity or quality of  
35  
36 268 food, or the anxiety surrounding food procurement, although this question has been  
37  
38 269 used in other food insufficiency analyses in Sub-Saharan Africa [14]. There was no  
39  
40 270 explicit statement that this question would not alter a participant’s eligibility for food  
41  
42 271 aid, which may have introduced bias. More complete information may be obtained  
43  
44 272 with a different measurement tool [15, 17].

45  
46  
47  
48  
49 273 Our findings suggest that extreme poverty, unemployment, illiteracy and alcohol  
50  
51 274 use are associated with food insufficiency among HIV-infected women in Rwanda. .  
52  
53 275 Addressing these structural factors through income generating activities, literacy  
54  
55 276 programs, or perhaps most importantly, renewed health through improved access to  
56  
57  
58  
59  
60

1  
2 277 ART, may help reduce the highly prevalent problem of food insufficiency in the Sub-  
3  
4 278 Saharan region.

5  
6  
7 279

8  
9 280 Acknowledgments:

10  
11 281 K.A., E.M. and C.S. designed the research. N.S., Q.S., D.H., C.S. and K.A. analyzed  
12  
13 282 the data. N.S. wrote the paper with input from all authors. N.S. had primary  
14  
15 283 responsibility for the final content. All authors read and approved the final  
16  
17 284 manuscript. We thank the patients and staff of RWISA.  
18  
19

20  
21 285

22  
23 286 Data sharing: There are no additional data available.  
24  
25

26 287

27  
28 288 Funding: This project has been funded by NIH/NIDA/NIAID/NCI grant

29  
30 289 5U01AI035004-16 (K Anastos).  
31  
32

33 290

34  
35 291 Competing interests: N Sirotin, DR Hoover, C Segal-Isaacson, Q Shi, A Adedimeji, E

36  
37 292 Mutimura, M Cohen, K Anastos declare no conflicts of interest.  
38  
39  
40  
41  
42  
43  
44  
45  
46  
47  
48  
49  
50  
51  
52  
53  
54  
55  
56  
57  
58  
59  
60



Table 1. Demographic, Clinical and Dietary Characteristics of HIV-infected Women

| Variable                          | Food Insufficient <sup>1</sup> | Sufficient Food <sup>2</sup> | P-value |
|-----------------------------------|--------------------------------|------------------------------|---------|
|                                   | N=228<br>n (%)                 | N=285<br>n (%)               |         |
| Age, years Mean (SD)              | 35.54 (7.11)                   | 35.29 (6.95)                 | 0.9211  |
| Age, years                        |                                |                              | 0.7275  |
| < 30                              | 42 (18.42)                     | 60 (21.05)                   |         |
| 30-40                             | 130 (57.02)                    | 154 (54.04)                  |         |
| > 40                              | 56 (24.56)                     | 71 (24.91)                   |         |
| Income, RWF month                 |                                |                              | 0.0004  |
| Income <10,000                    | 99 (43.42)                     | 82 (28.77)                   |         |
| 10,000-35,000                     | 107 (46.93)                    | 149 (52.28)                  |         |
| Income >35,000                    | 22 (9.65)                      | 54 (18.95)                   |         |
| Education                         |                                |                              | 0.0237  |
| None                              | 60 (26.55)                     | 51 (18.21)                   |         |
| Some primary school               | 91 (40.27)                     | 101 (36.07)                  |         |
| Completed primary school          | 56 (24.78)                     | 97 (34.64)                   |         |
| Some secondary or higher          | 19 (8.41)                      | 31 (11.07)                   |         |
| Literacy                          |                                |                              | 0.0117  |
| None                              | 62 (27.43)                     | 52 (18.57)                   |         |
| Some                              | 96 (42.48)                     | 112 (40.00)                  |         |
| Most and read all                 | 68 (30.09)                     | 116 (41.43)                  |         |
| Employed                          |                                |                              | 0.0091  |
| No                                | 203 (89.43)                    | 229 (80.92)                  |         |
| Yes                               | 24 (10.57)                     | 54 (19.08)                   |         |
| Electricity                       |                                |                              | 0.5039  |
| No                                | 199 (88.44)                    | 240 (86.33)                  |         |
| Yes                               | 26 (11.56)                     | 38 (13.67)                   |         |
| Alcohol use                       |                                |                              | <0.0001 |
| No                                | 184 (80.70)                    | 267 (94.01)                  |         |
| Yes                               | 44 (19.30)                     | 17 (5.99)                    |         |
| BMI, kg/m <sup>2</sup> Mean (SD)  | 22.30 (3.78)                   | 22.42 (3.70)                 | 0.8119  |
| BMI, kg/m <sup>2</sup>            |                                |                              | 0.4128  |
| >= 18.5                           | 190 (85.97)                    | 244 (88.73)                  |         |
| <18.5                             | 31 (14.03)                     | 31 (11.27)                   |         |
| CD4 count, cells/μL Mean (SD)     | 355.1(146.5)                   | 347.8 (141.1)                | 0.6634  |
| CD4 count, cells/μL               |                                |                              | 0.1339  |
| CD4 < 200                         | 25 (10.96)                     | 42 (14.74)                   |         |
| CD4 200-350                       | 102 (44.74)                    | 104 (36.49)                  |         |
| CD4 >350                          | 101 (44.30)                    | 139 (48.77)                  |         |
| Antiretroviral Use                |                                |                              | 0.9227  |
| No                                | 69 (30.26)                     | 84 (29.68)                   |         |
| Yes                               | 159 (69.74)                    | 199 (70.32)                  |         |
| Household Dietary Diversity Score |                                |                              | 0.0052  |
| > 3                               | 116 (50.88)                    | 181 (63.51)                  |         |
| <= 3                              | 112 (49.12)                    | 104 (36.49)                  |         |

<sup>1</sup> Reporting "Usually not" or "Never" to "Do you have enough food?"<sup>2</sup> Reporting "Sometimes" or "Always" to "Do you have enough food?"

Table 2. Univariate and Multivariate Analysis Factors associated with Food Insecurity, Household Dietary Diversity and BMI

| Variable                       | Food Insecurity<br>"Usually not" or "Never" to Do you have<br>enough food? |                                        | Household Dietary Diversity<br>HDDS $\leq$ 3 |                                        | BMI $\leq$ 18.5 <sup>#</sup>         |                                        |
|--------------------------------|----------------------------------------------------------------------------|----------------------------------------|----------------------------------------------|----------------------------------------|--------------------------------------|----------------------------------------|
|                                | Univariate<br>OR (95% CI)<br>p value                                       | Multivariate<br>OR (95% CI)<br>p value | Univariate<br>OR (95% CI)<br>p value         | Multivariate<br>OR (95% CI)<br>p value | Univariate<br>OR (95% CI)<br>p value | Multivariate<br>OR (95% CI)<br>p value |
| Age                            |                                                                            |                                        |                                              |                                        |                                      |                                        |
| < 30 years                     | Reference                                                                  |                                        | Reference                                    |                                        | Reference                            |                                        |
| 31-40 yrs                      | 1.21(0.76-1.91)                                                            |                                        | 1.21 ( 0.76, 1.92)                           |                                        | 1.33 (0.63,2.80)                     |                                        |
| > 40yrs                        | 1.13 (0.66-1.91)                                                           |                                        | 1.27 ( 0.75, 2.17)                           |                                        | 1.29 (0.56,2.99)                     |                                        |
| CD4                            |                                                                            |                                        |                                              |                                        |                                      |                                        |
| CD4 < 200 cells/ $\mu$ l       | Reference                                                                  |                                        | Reference                                    |                                        | Reference                            |                                        |
| CD4 200-350                    | 1.65 (0.94, 2.90)                                                          |                                        | 0.93 (0.53,1.63)                             |                                        | 0.81 (0.37,1.79)                     |                                        |
| CD4 > 350                      | 1.22 (0.70, 2.13)                                                          |                                        | 1.10 (0.64,1.91)                             |                                        | 0.76 (0.35,1.67)                     |                                        |
| Low Income, <i>RWF/year</i>    |                                                                            |                                        |                                              |                                        |                                      |                                        |
| <10,000                        | 2.96 (1.67-5.27) <sup>c</sup>                                              | 2.27 (1.22, 4.22) <sup>b</sup>         | 10.14 (4.90,21.01) <sup>c</sup>              | 8.72 (4.18, 18.20) <sup>c</sup>        | 1.83 (0.72,4.68)                     |                                        |
| <10,000-35 ,000                | 1.76 (1.01-3.07) <sup>a</sup>                                              | 1.45 (0.81, 2.61)                      | 4.16 (2.04,8.46) <sup>c</sup>                | 3.77 (1.84, 7.71) <sup>c</sup>         | 1.56 (0.62,3.89)                     |                                        |
| >35,000                        | Reference                                                                  | Reference                              | Reference                                    | Reference                              | Reference                            |                                        |
| No Education                   |                                                                            |                                        |                                              |                                        |                                      |                                        |
| None                           | 2.02 (1.05, 3.88) <sup>a</sup>                                             |                                        | 3.42 (1.70,6.87) <sup>c</sup>                |                                        | 1.43 (0.49,4.20)                     |                                        |
| Some primary vs.               | 1.54 (0.84, 2.84)                                                          |                                        | 2.30 (1.19,4.42) <sup>a</sup>                |                                        | 1.09 (0.39,3.08)                     |                                        |
| Completed primary              | 0.99 (0.53, 1.86)                                                          |                                        | 1.53 (0.78,3.00)                             |                                        | 1.83 (0.66,5.07)                     |                                        |
| Some secondary                 | Reference                                                                  |                                        | Reference                                    |                                        | Reference                            |                                        |
| Illiteracy: can read           |                                                                            |                                        |                                              |                                        |                                      |                                        |
| None                           | 2.06 (1.29, 3.30) <sup>b</sup>                                             | 1.91 (1.16, 3.15) <sup>a</sup>         | 2.90 (1.79,4.68) <sup>c</sup>                | 2.25 (1.36, 3.71) <sup>c</sup>         | 0.92 (0.45,1.91)                     |                                        |
| Some                           | 1.48 (0.99, 2.21)                                                          | 1.36 (0.89, 2.07)                      | 1.72 (1.14,2.59) <sup>b</sup>                | 1.46 (0.95, 2.25)                      | 1.02 (0.56,1.86)                     |                                        |
| Most or All                    | Reference                                                                  | Reference                              | Reference                                    | Reference                              | Reference                            |                                        |
| Unemployed                     |                                                                            |                                        |                                              |                                        |                                      |                                        |
| No Employed vs. Employed       | 1.99 (1.19, 3.34) <sup>b</sup>                                             | 1.92 (1.09, 3.38) <sup>a</sup>         | 2.13 (1.26,3.61) <sup>b</sup>                |                                        | 1.06 (0.50,2.25)                     |                                        |
| No Electricity                 |                                                                            |                                        |                                              |                                        |                                      |                                        |
| No electricity vs. electricity | 1.21 (0.71, 2.07)                                                          |                                        | 1.54 (0.89,2.69)                             |                                        | 1.33 (0.55,3.24)                     |                                        |
| Alcohol use                    |                                                                            |                                        |                                              |                                        |                                      |                                        |
| Any vs. none                   | 3.76 (2.08-6.78) <sup>c</sup>                                              | 4.89 (2.57, 9.29) <sup>c</sup>         | 0.69 (0.39,1.20)                             |                                        | 1.14 (0.51,2.53)                     |                                        |
| ART                            |                                                                            |                                        |                                              |                                        |                                      |                                        |
| ART vs. No ART                 | 0.97 ( 0.66, 1.42)                                                         |                                        | 1.18 (0.80,1.73)                             |                                        | 0.64 (0.37,1.12)                     |                                        |

P-value: a=0.01-0.05, b=0.001-0.01, c=<0.001

\*N=504-513, # N=487-497

## References:

1. Reaching sustainable food security for all by 2020: getting the priorities and responsibilities right, 2002, International Food Policy Research Institute: Washington D.C.
2. Bickel G, Nord M, Price C, et al. Guide to Measuring Household Food Security, 2000, U.S. Department of Agriculture, Food and Nutrition Service: Alexandria VA.
3. Weiser SD, Frongillo E, Ragland K, et al. Food insecurity is associated with incomplete HIV RNA suppression among homeless and marginally housed HIV-infected individuals in San Francisco. *J Gen Inter Med* 2009;24 14-20.
4. Mpontshane N., Van den Broeck J, Chhagan M, et al. HIV Infection Is Associated with Decreased Dietary Diversity in South African Children. *The Journal of Nutrition* 2008;138 1705 -1711.
5. Weiser SD, Fernandes KA, Brandson EK et al. The association between food insecurity and mortality among HIV-infected individuals on HAART. *J Acquir Immune Defic Syndr* 2009; 52 342-349.
6. Closing the gap in a generation: health equity through action on the social determinants of health in Final Report of the Commission on Social Determinants of Health 2008, World Health Organization: Geneva.
7. Millennium Development Goals. Towards sustainable social and economic growth in Country Report 2007, The National Institute of Statistics of Rwanda (NISR).
8. United Nations Development Programme, Rwanda 2011, United Nations Development Programme.

- 1  
2  
3 9. Karp RJ, Chang C, Meyers AF, The appearance of discretionary income:  
4 influence on the prevalence of under- and over-nutrition. *Int J Equity Health*  
5 2005; 4 10.  
6  
7
- 8  
9  
10 10. Jee SH, Sull JW, Park J, et al, Body-Mass Index and Mortality in Korean Men  
11 and Women. *New Engl Jof Medicine* 2006; 355 779-787.  
12
- 13  
14 11. Savy M, Martin-Prevel Y, Sawadogo P, et al. Use of variety/diversity scores for  
15 diet quality measurement: relation with nutritional status of women in a rural area  
16 in Burkina Faso. *Eur J Clin Nutr* 2005;59 703-16.  
17  
18
- 19  
20 12. Becquey E, Martin-Prevel Y. Micronutrient Adequacy of Women's Diet in Urban  
21 Burkina Faso Is Low. *J Nutr* 2010, 140 2079S-85S.  
22  
23
- 24  
25 13. Cohen M, Fabri M, Cai X, et al. Prevalence and Predictors of Posttraumatic  
26 Stress Disorder and Depression in HIV-Infected and At-Risk Rwandan Women. *J*  
27  
28  
29  
30  
31  
32 14. Weiser SD, Leiter K, Bangsberg DR, et al. Food insufficiency is associated with  
33 high-risk sexual behavior among women in Botswana and Swaziland. *PLoS Med*  
34 2007; 4 1589-97.  
35  
36  
37
- 38 15. Coates J, Swindale A, Bilinsky P. Household Food Insecurity Access Scale  
39 (HFIAS) for Measurement of Household Food Access: Indicator Guide in Food  
40 and Nutrition Technical Assistance Project 2007, Academy for Educational  
41  
42  
43  
44  
45  
46  
47 16. Swindale A, Bilinsky P. Household Dietary Diversity Score (HDDS) for  
48 Measurement of Household Food Access: Indicator Guide in Food and Nutrition  
49  
50  
51  
52  
53  
54  
55  
56  
57  
58  
59  
60
17. Becquey E, Martin-Prevel Y, Traissac P, et al. The Household Food Insecurity  
Access Scale and an Index-Member Dietary Diversity Score Contribute Valid and

- 1  
2  
3 Complementary Information on Household Food Insecurity in an Urban West-  
4 African Setting. J Nutr 2010;140 2233 -2240.  
5  
6  
7  
8 18. The World Bank , Poverty, 2010, The World Bank.  
9  
10 19. Department of Economic and Social Affairs,The Millennium Development Goals  
11 Report, 2009 New York.  
12  
13  
14 20. Braine T. Reaching Mexico's poorest. Bull World Health Organ 2006; 84 592-  
15 593.  
16  
17  
18 21. Laterveer L, Niessen L, Yazbeck AS. Pro-poor health policies in poverty  
19 reduction strategies. Health Policy and Planning 2003;18 138 -145.  
20  
21  
22 22. Nguyen P, Bich Hanh D, Lavergne MR, et al, The effect of a poverty reduction  
23 policy and service quality standards on commune-level primary health care  
24 utilization in Thai Nguyen Province, Vietnam. Health Policy and Planning 2010;25  
25 262 -271.  
26  
27  
28  
29  
30  
31 23. Dodd R, Hinshelwood E, Harvey C. Poverty Reduction Strategy Papers: Their  
32 Significance for Health in Second Synthesis Report 2004, World Health  
33 Organization.  
34  
35  
36  
37 24. Citro CF, Michael RT, eds: Measuring Poverty: A New Approach. Washington  
38 DC: National Academy Press; 1995.  
39  
40  
41  
42 25. [http://www.who.int/substance\\_abuse/publications/en/rwanda.pdf](http://www.who.int/substance_abuse/publications/en/rwanda.pdf). Accessed on  
43 11/20/2011.  
44  
45  
46  
47 26. World Bank. Education in Rwanda: rebalancing resources to accelerate post-  
48 conflict development and poverty reduction, in A World Bank country study 2004,  
49 The International Bank for Reconstruction and Development / The World Bank.  
50  
51  
52  
53 27. Rao N. Land rights, gender equality and household food security: Exploring the  
54 conceptual links in the case of India. Food Policy 2006;31 180-193.  
55  
56  
57  
58  
59  
60

- 1
  - 2
  - 3
  - 4
  - 5
  - 6
  - 7
  - 8
  - 9
  - 10
  - 11
  - 12
  - 13
  - 14
  - 15
  - 16
  - 17
  - 18
  - 19
  - 20
  - 21
  - 22
  - 23
  - 24
  - 25
  - 26
  - 27
  - 28
  - 29
  - 30
  - 31
  - 32
  - 33
  - 34
  - 35
  - 36
  - 37
  - 38
  - 39
  - 40
  - 41
  - 42
  - 43
  - 44
  - 45
  - 46
  - 47
  - 48
  - 49
  - 50
  - 51
  - 52
  - 53
  - 54
  - 55
  - 56
  - 57
  - 58
  - 59
  - 60
28. World Bank, World Development Report 2008: Agriculture for Development, 2008, The International Bank for Reconstruction and Development / The World Bank.
29. Maxwell D. Alternative food security strategy: A household analysis of urban agriculture in Kampala. World Development 1995;23 1669-1681.

For peer review only

STROBE Statement—Checklist of items that should be included in reports of *cross-sectional studies*

|                              | Item No | Recommendation                                                                                                                                                                                                                                                                                                                                                                                                |
|------------------------------|---------|---------------------------------------------------------------------------------------------------------------------------------------------------------------------------------------------------------------------------------------------------------------------------------------------------------------------------------------------------------------------------------------------------------------|
| <b>Title and abstract</b>    | 1       | (a) Indicate the study's design with a commonly used term in the title or the abstract<br>(b) Provide in the abstract an informative and balanced summary of what was done and what was found                                                                                                                                                                                                                 |
| <b>Introduction</b>          |         |                                                                                                                                                                                                                                                                                                                                                                                                               |
| Background/rationale         | 2       | Explain the scientific background and rationale for the investigation being reported                                                                                                                                                                                                                                                                                                                          |
| Objectives                   | 3       | State specific objectives, including any prespecified hypotheses                                                                                                                                                                                                                                                                                                                                              |
| <b>Methods</b>               |         |                                                                                                                                                                                                                                                                                                                                                                                                               |
| Study design                 | 4       | Present key elements of study design early in the paper                                                                                                                                                                                                                                                                                                                                                       |
| Setting                      | 5       | Describe the setting, locations, and relevant dates, including periods of recruitment, exposure, follow-up, and data collection                                                                                                                                                                                                                                                                               |
| Participants                 | 6       | (a) Give the eligibility criteria, and the sources and methods of selection of participants                                                                                                                                                                                                                                                                                                                   |
| Variables                    | 7       | Clearly define all outcomes, exposures, predictors, potential confounders, and effect modifiers. Give diagnostic criteria, if applicable                                                                                                                                                                                                                                                                      |
| Data sources/<br>measurement | 8*      | For each variable of interest, give sources of data and details of methods of assessment (measurement). Describe comparability of assessment methods if there is more than one group                                                                                                                                                                                                                          |
| Bias                         | 9       | Describe any efforts to address potential sources of bias                                                                                                                                                                                                                                                                                                                                                     |
| Study size                   | 10      | Explain how the study size was arrived at                                                                                                                                                                                                                                                                                                                                                                     |
| Quantitative variables       | 11      | Explain how quantitative variables were handled in the analyses. If applicable, describe which groupings were chosen and why                                                                                                                                                                                                                                                                                  |
| Statistical methods          | 12      | (a) Describe all statistical methods, including those used to control for confounding<br>(b) Describe any methods used to examine subgroups and interactions<br>(c) Explain how missing data were addressed<br>(d) If applicable, describe analytical methods taking account of sampling strategy<br>(e) Describe any sensitivity analyses                                                                    |
| <b>Results</b>               |         |                                                                                                                                                                                                                                                                                                                                                                                                               |
| Participants                 | 13*     | (a) Report numbers of individuals at each stage of study—eg numbers potentially eligible, examined for eligibility, confirmed eligible, included in the study, completing follow-up, and analysed<br>(b) Give reasons for non-participation at each stage<br>(c) Consider use of a flow diagram                                                                                                               |
| Descriptive data             | 14*     | (a) Give characteristics of study participants (eg demographic, clinical, social) and information on exposures and potential confounders<br>(b) Indicate number of participants with missing data for each variable of interest                                                                                                                                                                               |
| Outcome data                 | 15*     | Report numbers of outcome events or summary measures                                                                                                                                                                                                                                                                                                                                                          |
| Main results                 | 16      | (a) Give unadjusted estimates and, if applicable, confounder-adjusted estimates and their precision (eg, 95% confidence interval). Make clear which confounders were adjusted for and why they were included<br>(b) Report category boundaries when continuous variables were categorized<br>(c) If relevant, consider translating estimates of relative risk into absolute risk for a meaningful time period |
| Other analyses               | 17      | Report other analyses done—eg analyses of subgroups and interactions, and sensitivity analyses                                                                                                                                                                                                                                                                                                                |

|                          |    |                                                                                                                                                                            |
|--------------------------|----|----------------------------------------------------------------------------------------------------------------------------------------------------------------------------|
| <b>Discussion</b>        |    |                                                                                                                                                                            |
| Key results              | 18 | Summarise key results with reference to study objectives                                                                                                                   |
| Limitations              | 19 | Discuss limitations of the study, taking into account sources of potential bias or imprecision. Discuss both direction and magnitude of any potential bias                 |
| Interpretation           | 20 | Give a cautious overall interpretation of results considering objectives, limitations, multiplicity of analyses, results from similar studies, and other relevant evidence |
| Generalisability         | 21 | Discuss the generalisability (external validity) of the study results                                                                                                      |
| <b>Other information</b> |    |                                                                                                                                                                            |
| Funding                  | 22 | Give the source of funding and the role of the funders for the present study and, if applicable, for the original study on which the present article is based              |

\*Give information separately for exposed and unexposed groups.

**Note:** An Explanation and Elaboration article discusses each checklist item and gives methodological background and published examples of transparent reporting. The STROBE checklist is best used in conjunction with this article (freely available on the Web sites of PLoS Medicine at <http://www.plosmedicine.org/>, Annals of Internal Medicine at <http://www.annals.org/>, and Epidemiology at <http://www.epidem.com/>). Information on the STROBE Initiative is available at [www.strobe-statement.org](http://www.strobe-statement.org).





**Structural Determinants of Food Insufficiency, Low Dietary Diversity and BMI: a Cross Sectional Study of HIV-infected and HIV negative Rwandan Women**

|                                 |                                                                                                                                                                                                                                                                                                                                                                                                                                                                                                                                                                                                                                                                                                                                                                                                                            |
|---------------------------------|----------------------------------------------------------------------------------------------------------------------------------------------------------------------------------------------------------------------------------------------------------------------------------------------------------------------------------------------------------------------------------------------------------------------------------------------------------------------------------------------------------------------------------------------------------------------------------------------------------------------------------------------------------------------------------------------------------------------------------------------------------------------------------------------------------------------------|
| Journal:                        | <i>BMJ Open</i>                                                                                                                                                                                                                                                                                                                                                                                                                                                                                                                                                                                                                                                                                                                                                                                                            |
| Manuscript ID:                  | bmjopen-2011-000714.R1                                                                                                                                                                                                                                                                                                                                                                                                                                                                                                                                                                                                                                                                                                                                                                                                     |
| Article Type:                   | Research                                                                                                                                                                                                                                                                                                                                                                                                                                                                                                                                                                                                                                                                                                                                                                                                                   |
| Date Submitted by the Author:   | 20-Feb-2012                                                                                                                                                                                                                                                                                                                                                                                                                                                                                                                                                                                                                                                                                                                                                                                                                |
| Complete List of Authors:       | Sirotin, Nicole; Weill Cornell Medical College, Department of Medicine<br>Hoover, Donald; Institute for Health, Health Care Policy and Aging Research, Rutgers University, Department of Statistics and Biostatistics<br>Segal-Isaacson, CJ; Albert Einstein College of Medicine, Department of Epidemiology & Population Health<br>Shi, Qiuhu; New York Medical College, Department of Epidemiology and Community Health<br>Adedimeji, Adebola; Albert Einstein College of Medicine, Department of Epidemiology & Population Health<br>Mutimura, Eugene; Women's Equity in Access to Care and Treatment, Cohen, Mardge; Rush University and John Stroger (formerly Cook County) Hospital, Department of Medicine<br>Anastos, Kathryn; Albert Einstein College of Medicine, Department of Epidemiology & Population Health |
| <b>Primary Subject Heading</b>: | Global health                                                                                                                                                                                                                                                                                                                                                                                                                                                                                                                                                                                                                                                                                                                                                                                                              |
| Secondary Subject Heading:      | Infectious diseases, Nutrition and metabolism                                                                                                                                                                                                                                                                                                                                                                                                                                                                                                                                                                                                                                                                                                                                                                              |
| Keywords:                       | HIV & AIDS < INFECTIOUS DISEASES, Nutrition < TROPICAL MEDICINE, SOCIAL MEDICINE                                                                                                                                                                                                                                                                                                                                                                                                                                                                                                                                                                                                                                                                                                                                           |
|                                 |                                                                                                                                                                                                                                                                                                                                                                                                                                                                                                                                                                                                                                                                                                                                                                                                                            |

SCHOLARONE™  
Manuscripts

1  
2 **Structural Determinants of Food Insufficiency, Low Dietary Diversity and BMI: a**  
3 **Cross Sectional Study of HIV-infected and HIV negative Rwandan Women**  
4  
5  
6

7 Nicole Sirotin, Donald R Hoover, CJ Segal-Isaacson, Qiuhu Shi, Adebola Adedimeji,  
8 Eugene Mutimura, Mardge Cohen, Kathryn Anastos  
9

10  
11  
12 Nicole Sirotin, MD, Assistant Professor, Department of Medicine, Weill Cornell  
13 Medical College, New York, New York, Donald R Hoover, PhD, Professor,  
14 Department of Statistics and Biostatistics, and Institute for Health, Health Care  
15 Policy and Aging Research, Rutgers University, New Brunswick, New Jersey, CJ  
16 Segal-Isaacson, EdD, Assistant Clinical Professor, Department of Epidemiology and  
17 Population Health, Albert Einstein College of Medicine, Bronx, New York, Qiuhu Shi,  
18 PhD, Professor, Epidemiology and Community Health, New York Medical College,  
19 Valhalla, New York., Adebola Adedimeji, PhD, Assistant Professor Department of  
20 Epidemiology and Population Health, Albert Einstein College of Medicine, Bronx,  
21 New York, Eugene Mutimura, PhD, Women's Equity in Access to Care and  
22 Treatment, Kigali, Rwanda, Mardge Cohen, MD, Professor, Department of Medicine,  
23 John Stroger (formerly Cook County) Hospital and Rush University, Chicago, Illinois,  
24 Kathryn Anastos, MD, Professor Departments of Medicine and Epidemiology and  
25 Population Health, Montefiore Medical Center and Albert Einstein College of  
26 Medicine, Bronx, New York.  
27  
28  
29  
30  
31  
32  
33  
34  
35

36 Correspondence to: Nicole Sirotin, MD, 505 East 70<sup>th</sup> St, Helmsley Tower, 4<sup>th</sup> Floor,  
37 New York, NY 10021, Phone (212)746-5858, Fax(212) 746-0405, email:  
38 nis9066@cornell.med.edu.  
39  
40  
41  
42  
43  
44  
45  
46  
47  
48  
49

50 KEY WORDS: HIV, poverty, nutrition, international health  
51

52 WORD COUNT: 2980. NUMBER OF FIGURES: 0. NUMBER OF TABLES: 2.  
53

54 SUPPLEMENTARY MATERIAL: Online Supporting Material: 0.  
55  
56  
57  
58  
59  
60

1  
2  
3 1 Article Summary:  
4

5  
6 2 1) Article Focus

- 7  
8 3 a. What structural determinants are associated with food insufficiency, low  
9 dietary diversity and low **Body Mass Index (BMI) in HIV negative and**  
10 **HIV-infected women** in Rwanda?  
11 5  
12 6 b. What is the prevalence of food insufficiency, low dietary diversity and  
13 low BMI in **HIV negative and HIV-infected women** in Rwanda and are  
14 these outcomes correlated with each other?  
15 7  
16 8  
17 9 c. Hypotheses  
18  
19 i. #1: Poverty, **low literacy status** and alcohol use **are** associated  
20 with food insufficiency, low dietary diversity and low BMI.  
21  
22 ii. #2: Food insufficiency, low dietary diversity and low BMI **are**  
23 highly prevalent and **are** correlated with one another.  
24  
25  
26

27 14 2) Key messages

- 28  
29 15 a. Food insufficiency and **low dietary diversity are highly prevalent (46%**  
30 **and 43%, respectively)** and are associated with low income and  
31 illiteracy and strongly associated with alcohol use.  
32 17  
33 18 b. BMI (body mass index, kg/m<sup>2</sup>) is not correlated with food insufficiency  
34 or dietary diversity.  
35 19  
36 20 c. Significance: **Food Insufficiency and low dietary diversity, known**  
37 **contributors to poor health, are highly prevalent in HIV negative and**  
38 **HIV-infected women in Rwanda. Low BMI may not be an adequate**  
39 **screening tool for food insufficiency.** Extreme poverty, low literacy and  
40 alcohol use may contribute to food insufficiency and low dietary  
41 diversity. **These structural factors may be useful targets to prevent the**  
42 **adverse health effects of food insufficiency and low dietary diversity.**  
43  
44  
45  
46  
47  
48  
49

50 27 3) Strengths and limitations

- 51  
52 28 a. Strengths: Large cohort of **HIV negative and HIV-infected women**, very  
53 detailed tools used for food insufficiency and dietary diversity  
54 29  
55 30 b. Limitations: Cross sectional design, our measurement of food  
56 insufficiency is solely by self report.  
57 31  
58  
59  
60

1  
2 32 Abstract

3  
4 33 Objectives: In Sub-Saharan Africa, the overlapping epidemics of undernutrition and  
5  
6 34 HIV infection affect over 200 and 23 million people, respectively, and little is known  
7  
8 35 about the combined prevalence and nutritional effects. We sought to determine  
9  
10 36 which structural factors are associated with food insufficiency, low dietary diversity  
11  
12 37 and low BMI in HIV negative and HIV-infected Sub-Saharan women.

13  
14  
15  
16 38 Study Design: cross-sectional analysis of a longitudinal cohort

17  
18  
19 39 Setting: community-based women's organizations

20  
21 40 Participants: 161 HIV negative and 514 HIV-infected Rwandan women

22  
23 41 Primary and secondary outcome measures: Primary outcomes included food  
24  
25 42 insufficiency (reporting "usually not" or "never" to "Do you have enough food?"), low  
26  
27 43 household dietary diversity (Household Dietary Diversity Score  $\leq 3$ ) and BMI  $< 18.5$   
28  
29 44 ( $\text{kg}/\text{m}^2$ ). We also measured structural and behavioral factors including: income,  
30  
31 45 household size, literacy, and alcohol use.

32  
33  
34  
35 46 Results: Food insufficiency was prevalent (46%) as was low dietary diversity (43%)  
36  
37 47 and low BMI (15%). Food insufficiency and dietary diversity were associated with low  
38  
39 48 income [(aOR)=2.14 (95% CI 1.30, 3.52)  $p < 0.01$ ], [aOR]=6.51 (CI 3.66, 11.57)  
40  
41 49  $p < 0.001$ ], and illiteracy [aOR=2.00 (CI 1.31, 3.04)  $p < 0.01$ ], [aOR]=2.10 (CI 1.37,  
42  
43 50 3.23)  $p < 0.001$ ] and were not associated with HIV infection. Alcohol use was  
44  
45 51 strongly associated with food insufficiency [aOR=3.23 (CI 1.99, 5.24)  $p < 0.001$ ].  
46  
47 52 Low BMI was inversely associated with HIV infection [aOR  $\approx 0.5$ ] and was not  
48  
49 53 correlated with food insufficiency or dietary diversity.

50  
51  
52  
53  
54 54 Conclusions: Rwandan women experienced high rates of food insufficiency and low  
55  
56 55 dietary diversity. Extreme poverty, illiteracy and alcohol use, not HIV infection alone,  
57  
58  
59  
60

1  
2 56 may contribute to food insufficiency in Rwandan women. Food insufficiency, dietary  
3  
4 57 diversity and low do not correlate with one another; therefore, low BMI may not be an  
5  
6  
7 58 adequate screening tool for food insufficiency. Further studies are needed to  
8  
9 59 understand the health effects of not having enough food, low food diversity and low  
10  
11 60 weight in both HIV negative and HIV infected women.  
12  
13  
14 61  
15  
16 62  
17  
18 63  
19  
20  
21 64  
22  
23 65  
24  
25  
26 66  
27  
28 67  
29  
30  
31  
32  
33  
34  
35  
36  
37  
38  
39  
40  
41  
42  
43  
44  
45  
46  
47  
48  
49  
50  
51  
52  
53  
54  
55  
56  
57  
58  
59  
60

## 68 INTRODUCTION

69 Undernutrition, defined as the condition of people whose food consumption is  
70 continuously below a minimum dietary energy requirement for maintaining healthy  
71 life, affects over 850 million people worldwide and 200 million adults in Sub-Saharan  
72 Africa [1-4]. The effects of the overlap between undernutrition and HIV infection,  
73 which affects over 23 million in Sub-Saharan Africa, are not well understood [5]. In  
74 both HIV negative and HIV-infected individuals, undernutrition, food insufficiency and  
75 low dietary diversity are associated with poor health [5-8]. Food insufficiency may be  
76 caused by structural factors: social, political, economic structures or institutions that  
77 affect people's ability to control the conditions of their lives and meet their basic  
78 needs. Structural determinants of health include distribution of wealth, power and  
79 goods, access to education and schools, access to health care, and housing and  
80 environment conditions. These structural determinants play a major role in health  
81 inequities and greatly affect health status [9]. But structural factors associated with  
82 food insufficiency in Sub-Saharan women, and how such factors may be addressed  
83 to mitigate food insufficiency in the region is not well studied.

84 Food insufficiency (lack of adequate food to meet daily needs) is one aspect of  
85 food insecurity, a complex phenomenon describing lack of access to sufficient  
86 quantity and adequate quality of food, and anxiety in procuring food [2]. Over half of  
87 all households in Rwanda are thought to be food insecure, many of which are  
88 headed by women [10]. Rwanda has a significant number of female headed  
89 households (31%), partly due to the high numbers of genocide-related widows, and  
90 62% of female headed households live in poverty, compared to 54% of male-headed  
91 households [11]. Especially in vulnerable populations, such as HIV-infected women,

1  
2 92 gender disparities may prevent women from having control of family resources and  
3  
4 93 the discretionary income necessary for buying food [12].  
5

6 94 In HIV-infected women, food insufficiency may result in low body mass index  
7  
8 95 (BMI), which adversely affects health outcomes [13]. In addition, consuming fewer  
9  
10 96 nutritionally distinct food groups (low dietary diversity), which contributes to poor  
11  
12 97 health outcomes in African women and children [7], may reinforce malnutrition and  
13  
14 98 eventually result in poor health [14]. Many African diets consist of a single dominant  
15  
16 99 carbohydrate group, such as cassava, potato or yam which provides calories that  
17  
18 100 may maintain body weight, but often does not provide the micro and macronutrients  
19  
20 101 needed for proper immune function [15].  
21  
22  
23  
24

25 102 In HIV-infected individuals, food insecurity has been associated with low CD4  
26  
27 103 counts, virologic failure and increased mortality [6,8] . Low BMI ( $<18.5 \text{ kg/m}^2$ ) is a  
28  
29 104 strong predictor for mortality in HIV+ patients starting ART, with higher mortality in  
30  
31 105 persons who are both food insecure and underweight versus underweight but food  
32  
33 106 secure [8] . Although poverty is associated with poor health outcomes, income alone  
34  
35 107 does not always reflect the status of someone's "wealth." In populations with very  
36  
37 108 low incomes, markers for disposable or discretionary income, defined as income after  
38  
39 109 all essential items are paid for, may be more useful to define an individual's  
40  
41 110 socioeconomic status. These may include access to electricity and ability to buy non-  
42  
43 111 essential items such as alcohol. For women with HIV, it is unclear which structural  
44  
45 112 factors most influence food insecurity, and therefore have the greatest impact on  
46  
47 113 health outcomes.  
48  
49  
50  
51

52 114 In order to understand structural determinants of food insufficiency and  
53  
54 115 elucidate potential interventions to prevent food insufficiency and malnutrition in HIV  
55  
56  
57  
58  
59  
60

1  
2 116 [negative and HIV-infected women](#), we examined the prevalence and socio-  
3  
4 117 demographic associations of [food insufficiency, household dietary diversity and low](#)  
5  
6 118 [BMI](#) in such women in Rwanda. [We were specifically interested in the relationship](#)  
7  
8 119 [between poverty, low literacy, and alcohol use on food insufficiency, dietary diversity](#)  
9  
10 120 [and low BMI. We further examined the relationship between food insufficiency, low](#)  
11  
12 121 [BMI and low dietary diversity and whether these three outcomes were correlated with](#)  
13  
14 122 [one another in these women.](#)  
15  
16  
17  
18  
19  
20

## 21 124 **METHODS**

22  
23 125 Population and Setting: The Rwanda Women's Interassociation Study and  
24  
25 126 Assessment (RWISA) (described in detail elsewhere [16]) is a prospective  
26  
27 127 observational cohort designed to assess the effectiveness and toxicity of antiretroviral  
28  
29 128 therapy (ART) in HIV-infected Rwandan women. In 2005, 710 HIV-infected and 226  
30  
31 129 HIV-uninfected Rwandan women were recruited through community-based women's  
32  
33 130 organizations and [HIV clinical care sites](#). Eligible women were 25 years or older at  
34  
35 131 study entry, willing to give informed consent and [were present in Rwanda during the](#)  
36  
37 132 [genocide](#). HIV-infected women were excluded if they had prior history of receiving  
38  
39 133 antiretroviral treatment, [except single dose nevirapine to prevent mother to infant](#)  
40  
41 134 [transmission of HIV](#). Women were compensated 2500 Rwandan francs for each  
42  
43 135 visit. The Rwandan National Ethics Committee and the Institutional Review Board at  
44  
45 136 Montefiore Medical Center approved this study.  
46  
47  
48  
49  
50

51  
52 137 At each study visit participants provided historical information. Trained  
53  
54 138 research assistants collected socio-demographic data at study entry including age,  
55  
56 139 income, literacy level, [number of people in households](#), employment, access to  
57  
58  
59  
60



1  
2 140 electricity antiretroviral use (for HIV-infected women) and alcohol use. At each visit  
3  
4 141 participants had a physical examination and provided blood specimens for CD4  
5  
6 142 lymphocyte and complete blood counts. [This analysis included 161 HIV negative and](#)  
7  
8  
9 143 [514 HIV-infected women](#) who completed socio-demographic and nutritional data at  
10  
11 144 the fifth semi-annual visit, between July and December 2007.

13  
14 Measures:

15  
16 146 *Primary Outcomes:* Food insufficiency was assessed using a single question, “Do  
17  
18 147 you have enough food?” with the women answering “usually not” or “never” classified  
19  
20  
21 148 as food insecure [17,18]. Household dietary diversity was assessed using a modified  
22  
23 149 Household Dietary Diversity Score (HDDS), a validated tool measuring household  
24  
25 150 food consumption over the previous 24 hours, [giving one point each for having eaten](#)  
26  
27  
28 151 [an item in the following food class \(total 6 points possible: Class-1\) cereals and roots;](#)  
29  
30 152 [Class-2\) vegetables; Class-3\) fruits; Class-4\) meat protein \[including meat, eggs,](#)  
31  
32 153 [fish\]; Class-5\) vegetable protein \[including legumes, beans, nuts\]; Class-6\) extras](#)  
33  
34 154 [\[including oil, fat, sugar, condiments\]\].](#) Determination of “Low household dietary  
35  
36 155 diversity” is described in detail elsewhere, [19] briefly, the sample was divided into  
37  
38 156 income terciles with the mean HDDS for the lowest income tercile ( $\leq 3$ ) representing  
39  
40 157 low dietary diversity [15,19,20]. [Body mass index \(BMI\) was calculated using weight](#)  
41  
42 158 [divided by height-squared \(kg/m<sup>2</sup>\).](#) [Standing height and weight were measured](#)  
43  
44 159 [while the participant was wearing light clothing and no shoes. BMI was dichotomized](#)  
45  
46 160 [to  \$\leq 18.5\$  or  \$>18.5\$  for the analysis.](#)

47  
48  
49  
50  
51 161 Independent variables: Income categories were defined as 1) >35,000 Rwandan  
52  
53 162 Francs (\$US 58), 2) 35,000-10,000, and 3) <10,000 RWF (\$US 17), per month.

54  
55  
56 163 [Alcohol use was queried as “Since the last visit, have you had a drink containing](#)  
57  
58  
59  
60

1  
2 164 alcohol?" and was dichotomized to yes vs. no. Literacy was defined as "can read all,  
3  
4 165 most, some or none," and for the analysis was dichotomized to none vs. some, most  
5  
6 166 or all. For HIV-infected women antiretroviral use at the current visit was assessed by  
7  
8  
9 167 self-report with verification of date of initiation and regimen by tracking cards provided  
10  
11 168 to the participants by providers in the national treatment program. CD4 counts were  
12  
13  
14 169 determined with a FACS counter (Becton and Dickinson, Immunocytometry Systems,  
15  
16 170 San Jose, CA, USA).

17 171 Data Analysis:

18  
19 172 Categorical variables were compared using contingency tables with P-values from  
20  
21 173 exact tests. Univariate logistic regression identified factors associated with food  
22  
23 174 insecurity, low dietary diversity, and BMI. Multivariate logistic regression models were  
24  
25 175 built using backward selection with a p-value of 0.05 to stay in the model. Wilcoxon  
26  
27 176 rank sum and Kappa statistics assessed relationships between food insecurity, BMI  
28  
29 177 and dietary diversity as continuous variables and as dichotomous variables (food  
30  
31 178 insecurity= answering "usually not" or "never" to "Do you have enough food",  
32  
33 179 HDDS $\leq$ 3, BMI  $\leq$ 18.5), respectively. Statistical analysis was performed using SAS  
34  
35 180 (version 9.1.3, SAS Institute Inc, Cary, NC USA).  
36  
37  
38  
39  
40  
41  
42  
43  
44

181

45 182 **RESULTS**

46  
47 183 Overall food insufficiency (top row of Table 1) was highly prevalent with 46%  
48  
49 184 of women reporting "usually not" or "never" to "Do you have enough food?" and  
50  
51 185 another 45% reporting they "sometimes" did not have enough food (data not shown).  
52  
53 186 Almost half the population reported low dietary diversity (HDDS <3) and 15% of  
54  
55 187 women met WHO criteria for malnutrition with a BMI <18.5 kg/m<sup>2</sup>. The percentage of  
56  
57  
58  
59  
60

1  
2 188 women reporting food insufficiency and low dietary diversity did not differ between  
3  
4 189 HIV negative and HIV-infected women. The percentage of women with BMI <18.5  
5  
6 190 was higher in HIV negative women as compared to HIV infected women with  
7  
8  
9 191 CD4>350, 200-350, <200 (24%, vs. 11.8%, 12.4%, 14.9%, p=0.004), respectively.  
10  
11 192 Table 1 further breaks the food insecurity outcomes down by participant  
12  
13  
14 193 characteristics. As the numbers in column 2 of Table 1, show, the prevalence of  
15  
16 194 poverty was high; 36% reported a monthly income of less than <10K Rwandan  
17  
18 195 Francs (FRW) (\$US 17). Illiteracy was present in one quarter of the population and  
19  
20  
21 196 another 40% reported only reading “some”. Alcohol use was rare with 13% reporting  
22  
23 197 they had at least one drink in the last month. Of the HIV-infected women, almost one  
24  
25 198 third had CD4 counts over 350 and almost 70% of participants took antiretroviral  
26  
27 199 therapy at this visit.

30 200 Structural factors associated with food insufficiency included (Table 1): low  
31  
32 201 income, with 52.5% of those with monthly income <10,000 FRW, 43.6% of those with  
33  
34 202 monthly income 10,000 – 35,000 FRW and 31.8% of those with > 35,000 FRW  
35  
36 203 reporting food insufficiency, p=0.001; illiteracy with 57.1% of those who can't read,  
37  
38 204 44.5% of those with some literacy and 34.6% of those fully literate reporting food  
39  
40 205 insufficiency, p=0.0002; and alcohol use with 68.9% of users vs. 41.2% of nonusers  
41  
42 206 reporting food insufficiency, p<0.0001.

46 207 Structural factors associated with low dietary diversity (HDDS<3) were again;  
47  
48 208 low income with 58.9% of those with monthly income <10,000 FRW, 39.3% with  
49  
50 209 income 10,000–35,000 FRW and 16.2% of those with income >35,000 FRW having  
51  
52 210 low dietary diversity p<0.0001; illiteracy with 55.2%, 44.4% and 31.6% of those with  
53  
54 211 none, some and complete literacy having low dietary diversity, p<0.0001.  
55  
56  
57  
58  
59  
60

1  
2 212 Only HIV status had statistically significant associations with BMI. Surprisingly  
3  
4 213 the association was in the opposite direction expected with 24.2% of HIV negatives  
5  
6 214 compared to 11.8 – 14.9% of HIV positive women of all CD4 levels having BMI  
7  
8  
9 215 <18.5, p=0.004.

10  
11 216 The univariate logistic regression models of Table 2 find the same unadjusted  
12  
13 217 associations of structural factors with outcomes just described for Table 1, here we  
14  
15 218 discuss the multivariate models. In the final stepwise multivariate model (Table 2),  
16  
17 219 food insufficiency was independently associated with low income [Adjusted Odds  
18  
19 220 ratio (aOR) 2.14; 95% CI 1.30-3.52 for >35,000 FRW vs. <10,000 FRW], and  
20  
21 221 illiteracy (aOR=2.00; CI 1.31-3.04) (Table 2). Alcohol use (none vs. any use) was  
22  
23 222 strongly independently associated with being food insufficient (aOR=3.23; CI 1.99-  
24  
25 223 5.24). Factors independently associated with low dietary diversity (HDDS <3.0)  
26  
27 224 included low monthly income (aOR=6.51; CI 3.36-11.57 for income <10,000  
28  
29 225 vs. >35,000 FRW and aOR=3.07; CI 1.76-5.37 for income 10,000-35,000 FRW  
30  
31 226 vs. >35,000 FRW) and illiteracy (aOR=2.10, CI 1.37-3.23). As in Table 1, HIV status  
32  
33 227 had the only independent association with HIV positive women of all CD4 levels  
34  
35 228 being *less* likely to have low BMI.  
36  
37  
38  
39  
40  
41  
42  
43  
44

45 230 When analyzed as continuous variables, no significant correlations were found  
46  
47 231 between self-reported food insufficiency and BMI (r=-0.05, p=0.29). A statistically  
48  
49 232 significant but weak correlation was found between dietary diversity and BMI r=0.09,  
50  
51 233 p=0.03 and food insufficiency and dietary diversity: r=0.14, p<0.001. When analyzed  
52  
53 234 as dichotomous variables, no significant correlations were found between food  
54  
55  
56  
57  
58  
59  
60

1  
2 235 insufficiency and BMI, Kappa (K) =0.02, dietary diversity and BMI, K=0.02 or food  
3  
4 236 insufficiency and dietary diversity, K=0.12.  
5  
6  
7 237

## 8 9 238 **DISCUSSION**

10  
11 239 While HIV uninfected and HIV-infected Rwandan women experienced high rates of  
12  
13 240 food insufficiency (46%) and low dietary diversity (43%), only 15% of the women had  
14  
15 241 low BMI. HIV status did not confer differences except in BMI, where the opposite of  
16  
17 242 what was expected was seen, a *higher* proportion of HIV uninfected women had BMI  
18  
19 243 <18.5. Furthermore neither food insufficiency nor lack of dietary diversity was  
20  
21 244 associated with BMI, suggesting that low BMI in these women was not resulting from  
22  
23 245 food insufficiency alone. Structural factors including low income and illiteracy were  
24  
25 246 associated with food insufficiency and behavioral factors, such as alcohol use, was  
26  
27 247 associated with low dietary diversity. Our findings highlight three important aspects  
28  
29 248 useful in the relationship between food insufficiency, dietary diversity and BMI in  
30  
31 249 vulnerable populations.  
32  
33  
34  
35  
36

37 250 First, few women had low BMI (15%), while almost half were either food  
38  
39 251 insufficient or had low dietary diversity. A higher percentage of HIV uninfected  
40  
41 252 women had BMI <18.5 as compared to HIV infected women. This is likely explained  
42  
43 253 by food supplementation programs provided by community organizations that are  
44  
45 254 available exclusively to the HIV-infected women. These programs provide additional  
46  
47 255 supply of the staple foods, which may provide enough calories to prevent  
48  
49 256 malnutrition, but do not add to dietary diversity or change the perception of not  
50  
51 257 having enough food. Additionally, BMI was not correlated with self-reported food  
52  
53 258 insufficiency or dietary diversity. BMI is often measured in clinical settings and used  
54  
55  
56  
57  
58  
59  
60

1  
2 259 to monitor people's nutritional status. Because of the known health effects of food  
3  
4 260 insufficiency and low dietary diversity, separate from BMI [6,7,14], and the lack of  
5  
6 261 correlation between the three outcomes, our results support that BMI should not be  
7  
8 262 considered as a sole marker for food insufficiency in HIV uninfected or HIV-infected  
9  
10 263 women. The weak association between self-reported food insufficiency and dietary  
11  
12 264 diversity may reflect an inexpensive, abundant single food group, such as potatoes or  
13  
14 265 cassava root, common in Rwanda, that provide a sufficient yet minimally diverse diet.  
15  
16 266 Body weight may be maintainable on a low nutrient density starchy diet that includes  
17  
18 267 suboptimal protein and micronutrient consumption. Additionally, if that single food  
19  
20 268 group is cassava, it provides a much lower protein and micronutrient source than  
21  
22 269 potato, yams or rice.

23  
24  
25  
26  
27  
28 270 Second, women who had incomes of <\$17 per month (equal to 10,000 RWF per  
29  
30 271 month) were more likely to be food insecure when compared with women whose  
31  
32 272 incomes were >\$60 monthly (equal to 35,000 RWF per month). The World Bank  
33  
34 273 defines extreme poverty as <\$1.25/ day (~\$37/month) and moderate poverty at  
35  
36 274 <\$2/day (~\$60/month): significant differences exist in health outcomes for these two  
37  
38 275 groups [21] . This highlights a potentially important target for both ministries of health  
39  
40 276 and international aid organizations and is consistent with the Millennium  
41  
42 277 Development Goals to eradicate poverty [22] . HIV negative and HIV-infected women  
43  
44 278 whose income is less than \$1.25/day may benefit from income supplementation  
45  
46 279 programs to help prevent food insufficiency and therefore the adverse health effects  
47  
48 280 of food insufficiency and low dietary diversity [23]. Alternatively, poverty reduction  
49  
50 281 strategies, or job skills training programs, may be beneficial public health  
51  
52 282 interventions for these women [24-26].  
53  
54  
55  
56  
57  
58  
59  
60

1  
2 283 Alcohol use has known adverse health effects and is a known risk factor for HIV  
3  
4 284 transmission [17]. Less is known about the relationship with alcohol use and food  
5  
6 285 insufficiency. Alcohol can be used as a marker for disposable income, similar to  
7  
8  
9 286 other luxury items [27]. In our analysis, alcohol use was rare with only 13% of the  
10  
11 287 women stating they had at least one drink in the last month. This reflects that casual  
12  
13 288 alcohol drinking is not the social norm this population of Rwandan women, as  
14  
15  
16 289 compared to other nearby countries, such as Uganda, where drinking is considered a  
17  
18 290 socially acceptable activity. The Ugandan Health and Demographic survey found up  
19  
20  
21 291 to one quarter of women reporting drinking in the last month and 18% stated they  
22  
23 292 drank alcohol daily [28,29]. Alcohol use was associated with higher rates of food  
24  
25 293 insufficiency, even when controlled for by income, suggesting it reflected diversion of  
26  
27  
28 294 disposable income from food to alcohol, not just a reflection that more money is  
29  
30 295 available for alcohol purchase. Data on alcohol misuse in Rwandan women are  
31  
32  
33 296 limited, with an estimated national pure alcohol use of 4.3 L per capita [30]. Our data  
34  
35 297 further supports the use of alcohol as an important point of intervention to help  
36  
37 298 prevent the adverse health effects of food insufficiency and low dietary diversity.

39  
40 299 Lastly, we found that illiteracy was independently associated with greater food  
41  
42 300 insufficiency and low dietary diversity. This may be because low literacy is an  
43  
44 301 important aspect of “income generating capacity,” which is critical to ability to obtain  
45  
46  
47 302 relevant dietary diversity and food security. Gender differences in educational and  
48  
49 303 literacy attainment in Rwanda may lead to men procuring non-farm jobs with  
50  
51 304 increased income potential which may increase the numbers of women left to  
52  
53 305 manage the family agricultural plots [31]. Further studies need to be done to  
54  
55  
56 306 determine if literacy programs would benefit the level of food security and health  
57  
58  
59  
60

1  
2 307 status of both [HIV negative and HIV-infected women](#). Improving land reform laws in  
3  
4 308 Rwanda that strengthen women's positions to own and farm their own land, and  
5  
6 309 empower them with alternative farming techniques, may increase their food security  
7  
8  
9 310 in both urban and rural areas, [and therefore improve their health](#) [32-34].  
10

11 Limitations of our study include its cross-sectional nature, which does not allow us  
12  
13  
14 312 to infer causality. Our measurement of food insufficiency is solely by self report. The  
15  
16 313 question, "Do you have enough food?" does not address the quantity or quality of  
17  
18 314 food, or the anxiety surrounding food procurement, although this question has been  
19  
20  
21 315 used in other food insufficiency analyses in Sub-Saharan Africa [17]. [There was no](#)  
22  
23 316 [explicit statement that this question would not alter a participant's subsequent](#)  
24  
25 317 [eligibility for food aid, which may have introduced response bias. More complete](#)  
26  
27  
28 318 [information may be obtained with a different measurement tool which would address](#)  
29  
30 319 [food insecurity \(insufficiency quantity, quality or anxiety in procuring food\), in addition](#)  
31  
32 320 [to food insufficiency \(not enough food\) \[18, 20\]. A longitudinal study design would be](#)  
33  
34  
35 321 [helpful to determine the specific health effects of food insecurity on women over time.](#)  
36

37  
38 322 Our findings suggest that extreme poverty, illiteracy and alcohol use are  
39  
40 323 associated with food insufficiency among [HIV-infected and HIV negative](#) women in  
41  
42 324 Rwanda. [Addressing these structural factors through income generating activities,](#)  
43  
44 325 [literacy programs, substance abuse treatment,](#) or perhaps most importantly, renewed  
45  
46 326 health through improved access to ART for HIV-infected women, may help reduce  
47  
48  
49 327 the highly prevalent problem of food insufficiency in the Sub-Saharan region.  
50

51  
52 328

53  
54 329 Acknowledgments:  
55  
56  
57  
58  
59  
60



1  
2 330 K.A., E.M. and C.S. designed the research. N.S., Q.S., D.H., C.S. and K.A. analyzed  
3  
4 331 the data. N.S. wrote the paper with input from all authors. N.S. had primary  
5  
6 332 responsibility for the final content. All authors read and approved the final  
7  
8 333 manuscript. We thank the patients and staff of RWISA.  
9  
10

11 334  
12  
13 335 Data sharing: There are no additional data available.  
14  
15

16 336  
17  
18 337 Funding: This project has been funded by NIH/NIDA/NIAID/NCI grant  
19  
20 338 5U01AI035004-16 (K Anastos).  
21  
22

23 339  
24  
25 340 Competing interests: N Sirotin, DR Hoover, C Segal-Isaacson, Q Shi, A Adedimeji, E  
26  
27 341 Mutimura, M Cohen, K Anastos declare no conflicts of interest.  
28  
29  
30  
31  
32  
33  
34  
35  
36  
37  
38  
39  
40  
41  
42  
43  
44  
45  
46  
47  
48  
49  
50  
51  
52  
53  
54  
55  
56  
57  
58  
59  
60

Table 1. Demographic, Clinical and Dietary Characteristics of HIV negative and HIV infected women.

| Participant Characteristic              | Proportion of total population | Measure of Food Insufficiency by Participant Characteristic |         |                                                                |         |                                     |         |
|-----------------------------------------|--------------------------------|-------------------------------------------------------------|---------|----------------------------------------------------------------|---------|-------------------------------------|---------|
|                                         |                                | Self-Reported Food Insufficient <sup>1</sup>                |         | Self-Reported Low Dietary Diversity HDDS $\leq 3$ <sup>2</sup> |         | Low Weight BMI $<18.5$ <sup>3</sup> |         |
|                                         |                                | Percent of Subgroup With Outcome                            | P-value | Percent of Subgroup With Outcome                               | P-value | Percent of Subgroup With Outcome    | P-value |
| <b>Total</b>                            | N=675                          | 45.9%                                                       |         | 43.4%                                                          |         | 15.3%                               |         |
| HIV positive CD4 count, <i>cells/μL</i> |                                |                                                             | 0.24    |                                                                | 0.84    |                                     | 0.004   |
| HIV Negative (N=161)                    | 24.5%                          | 46.3%                                                       |         | 43.5%                                                          |         | 24.2%                               |         |
| HIV+ CD4>350 (N=240)                    | 34.8%                          | 42.1%                                                       |         | 44.2%                                                          |         | 11.8%                               |         |
| HIV+ 200-350 (N=207)                    | 30.6%                          | 49.5%                                                       |         | 40.1%                                                          |         | 12.4%                               |         |
| HIV+ CD4<200 (N=67)                     | 10.2%                          | 37.3%                                                       |         | 41.8%                                                          |         | 14.9%                               |         |
| Antiretroviral Use                      |                                |                                                             | 0.89    |                                                                | 0.41    |                                     | 0.12    |
| No (N=154)                              | 30.7%                          | 45.1%                                                       |         | 39.6%                                                          |         | 15.8%                               |         |
| Yes (N=358)                             | 69.3%                          | 44.4%                                                       |         | 43.6%                                                          |         | 10.8%                               |         |
| Number of people in household           |                                |                                                             | 0.68    |                                                                | 0.42    |                                     | 0.18    |
| 0-2 (N= 158)                            | 24.5%                          | 41.8%                                                       |         | 41.1%                                                          |         | 11.6%                               |         |
| 3-5 (N= 326)                            | 50.3%                          | 46.0%                                                       |         | 43.9%                                                          |         | 17.6%                               |         |
| >5 (N= 167)                             | 25.2%                          | 44.8%                                                       |         | 37.7%                                                          |         | 13.1%                               |         |
| Age, years                              |                                |                                                             | 0.36    |                                                                | 0.57    |                                     | 0.02    |
| < 30 (N= 122)                           | 17.9%                          | 40.2%                                                       |         | 38.5%                                                          |         | 10.2%                               |         |
| 30-40(N= 321)                           | 47.1%                          | 44.4%                                                       |         | 42.7%                                                          |         | 13.6%                               |         |
| > 40(N= 232)                            | 35.0%                          | 48.0%                                                       |         | 44.4%                                                          |         | 20.4%                               |         |
| Income, <i>RWF month</i>                |                                |                                                             | 0.001   |                                                                | <0.0001 |                                     | 0.28    |
| Income <10,000 (N= 241)                 | 35.7%                          | 52.5%                                                       |         | 58.9%                                                          |         | 17.0%                               |         |
| 10,000-35,000 (N= 323)                  | 48.2%                          | 43.6%                                                       |         | 39.3%                                                          |         | 15.8%                               |         |
| Income >35,000 (N= 111)                 | 16.1%                          | 31.8%                                                       |         | 16.2%                                                          |         | 10.4%                               |         |
| Literacy                                |                                |                                                             | 0.0002  |                                                                | <0.0001 |                                     | 0.71    |
| None (N=163)                            | 24.9%                          | 57.1%                                                       |         | 55.2%                                                          |         | 16.9%                               |         |
| Some (N=266)                            | 40.4%                          | 44.5%                                                       |         | 44.4%                                                          |         | 15.8%                               |         |
| Most and read all (N=231)               | 34.7%                          | 36.1%                                                       |         | 31.6%                                                          |         | 13.9%                               |         |
| Alcohol use                             |                                |                                                             | <0.0001 |                                                                | 0.06    |                                     | 0.14    |
| No (N=584)                              | 86.8%                          | 41.2%                                                       |         | 44.0%                                                          |         | 14.6%                               |         |
| Yes (N=90)                              | 13.2%                          | 68.9%                                                       |         | 33.3%                                                          |         | 20.7%                               |         |

1. Reporting "Usually not" or "Never" to "Do you have enough food; 2. Household Dietary Diversity Score; 3.Body Mass Index ( $kg/m^2$ ) \*among HIV+ women

Table 2. Univariate and Multivariate Analysis Factors associated with Food Insecurity, Household Dietary Diversity and BMI

| Variable                      | Food Insufficiency <sup>1</sup>   |                                     | Household Dietary Diversity Score $\leq 3$ <sup>2</sup> |                                     | BMI <sup>3</sup> $\leq 18.5$      |                                     |
|-------------------------------|-----------------------------------|-------------------------------------|---------------------------------------------------------|-------------------------------------|-----------------------------------|-------------------------------------|
|                               | Univariate OR (95% CI)<br>p value | Multivariate OR (95% CI)<br>p value | Univariate OR (95% CI)<br>p value                       | Multivariate OR (95% CI)<br>p value | Univariate OR (95% CI)<br>p value | Multivariate OR (95% CI)<br>p value |
| HIV negative                  | Reference                         |                                     | Reference                                               |                                     | Reference                         | Reference                           |
| HIV positive, CD4             | -                                 |                                     | -                                                       |                                     | -                                 | -                                   |
| CD4 > 350 cells/ $\mu$ l      | 0.69 (0.39, 1.24)                 |                                     | 0.93 (0.52, 1.66)                                       |                                     | 0.55 (0.26, 1.18)**               | 0.55 (0.26, 1.18)**                 |
| CD4 200-350                   | 1.14 (0.75, 1.72)                 |                                     | 0.87 (0.57, 1.32)                                       |                                     | 0.44 (0.26, 0.77)**               | 0.44 (0.26, 0.77)**                 |
| CD4 < 200                     | 0.84 (0.56, 1.26)                 |                                     | 1.03 (0.69, 1.54)                                       |                                     | 0.42 (0.24, 0.72)**               | 0.42 (0.24, 0.72)**                 |
| ART use <sup>4</sup>          | 0.97 (0.66, 1.42)                 |                                     | 1.18 (0.80, 1.73)                                       |                                     | 0.64 (0.37, 1.12)                 |                                     |
| Number of people in household |                                   |                                     |                                                         |                                     |                                   |                                     |
| 0-2                           | Reference                         |                                     | Reference                                               |                                     | Reference                         |                                     |
| 3-5                           | 1.19 (0.81, 1.74)                 |                                     | 1.12 (0.76, 1.64)                                       |                                     | 1.62 (0.92, 2.86)                 |                                     |
| >5                            | 1.13 (0.73, 1.76)                 |                                     | 0.87 (0.56, 1.35)                                       |                                     | 1.15 (0.59, 2.25)                 |                                     |
| Age                           |                                   |                                     |                                                         |                                     |                                   |                                     |
| < 30 years                    | Reference                         |                                     | Reference                                               |                                     | Reference                         |                                     |
| 31-40 yrs                     | 1.19 (0.78, 1.82)                 |                                     | 1.19 (0.78, 1.82)                                       |                                     | 1.38 (0.70, 2.73)                 |                                     |
| > 40yrs                       | 1.38 (0.88, 2.15)                 |                                     | 1.27 (0.81, 1.99)                                       |                                     | 2.27 (1.15, 4.47)                 |                                     |
| Low Income, <i>RWF/year</i>   |                                   |                                     |                                                         |                                     |                                   |                                     |
| <10,000                       | 2.37 (1.47, 3.81)***              | 2.14 (1.30, 3.52)**                 | 7.41 (4.21, 13.05)***                                   | 6.51 (3.66, 11.57)***               | 1.77 (0.87, 3.61)                 |                                     |
| <10,000-35,000                | 1.66 (1.05, 2.62)**               | 1.52 (0.94, 2.44)                   | 3.35 (1.93, 5.81)**                                     | 3.07 (1.76, 5.37)**                 | 1.62 (0.81, 3.24)                 |                                     |
| >35,000                       | Reference                         | Reference                           | Reference                                               | Reference                           | Reference                         |                                     |
| Illiteracy: can read          |                                   |                                     |                                                         |                                     |                                   |                                     |
| None                          | 2.25 (1.50, 3.37)***              | 2.00 (1.31, 3.04)**                 | 2.61 (1.73, 3.92)***                                    | 2.10 (1.37, 3.23)***                | 1.26 (0.73, 2.19)                 |                                     |
| Some                          | 1.36 (0.95, 1.94)                 | 1.24 (0.86, 1.79)                   | 1.69 (1.17, 2.42)**                                     | 1.48 (1.01, 2.16)*                  | 1.16 (0.71, 1.91)                 |                                     |
| Most or All                   | Reference                         | Reference                           | Reference                                               | Reference                           | Reference                         |                                     |
| Alcohol use                   |                                   |                                     |                                                         |                                     |                                   |                                     |
| Any vs. none                  | 3.15 (1.96, 5.08)***              | 3.23 (1.99, 5.24)***                | 0.64 (0.40, 1.02)                                       | 0.60 (0.37, 0.98)                   | 1.53 (0.87, 2.70)                 |                                     |

1. "Usually not" or "Never" to Do you have enough food?, N=302, 2. Household Dietary Diversity Score, N=186, 3. Body Mass Index (kg/m<sup>2</sup>), N=101, 4. Was not considered for multivariate models as it was only defined for HIV positive women and was never statistically significant in unadjusted models

P-value: \*\*=0.001-0.01, \*\*\*=<0.001

## References:

1. Reaching sustainable food security for all by 2020: getting the priorities and responsibilities right, 2002, International Food Policy Research Institute: Washington D.C.
2. Bickel G, Nord M, Price C, et al. Guide to Measuring Household Food Security, 2000, U.S. Department of Agriculture, Food and Nutrition Service: Alexandria VA.
3. *Women in Agriculture: Closing the gender gap for development*. 2011, Food and Agriculture Organization: Rome.
4. Shapouri S RS, Peters M, Tandon S, Gale F, Mancino L, Bai J. *International Food Security Assessment 2011-21*. Washington DC: Economic Research Service/US Department of Agriculture;2011.
5. UNAIDS. Global Report Fact Sheet. Sub Saharan Africa. 2011.
6. Weiser SD, Frongillo E, Ragland K, et al. Food insecurity is associated with incomplete HIV RNA suppression among homeless and marginally housed HIV-infected individuals in San Francisco. *J Gen Inter Med* 2009;24 14-20.
7. Mpontshane N,, Van den Broeck J, Chhagan M, et al. HIV Infection Is Associated with Decreased Dietary Diversity in South African Children. *The Journal of Nutrition* 2008;138 1705 -1711.
8. Weiser SD, Fernandes KA, Brandson EK et al. The association between food insecurity and mortality among HIV-infected individuals on HAART. *J Acquir Immune Defic Syndr* 2009; 52 342-349.
9. Closing the gap in a generation: health equity through action on the social determinants of health in Final Report of the Commission on Social Determinants of Health 2008, World Health Organization: Geneva.

- 1  
2  
3 10. Millennium Development Goals. Towards sustainable social and economic  
4 growth in Country Report 2007, The National Institute of Statistics of Rwanda  
5 (NISR).  
6  
7  
8
- 9  
10 11. United Nations Development Programme, Rwanda 2011, United Nations  
11 Development Programme.  
12
- 13  
14 12. Karp RJ, Chang C, Meyers AF. The appearance of discretionary income:  
15 influence on the prevalence of under- and over-nutrition. *Int J Equity Health*  
16 2005; 4 10.  
17  
18
- 19  
20 21 13. Jee SH, Sull JW, Park J, et al. Body-Mass Index and Mortality in Korean Men  
22 and Women. *New Engl J of Medicine* 2006; 355 779-787.  
23
- 24  
25 26 14. Savy M, Martin-Prevel Y, Sawadogo P, et al. Use of variety/diversity scores for  
27 diet quality measurement: relation with nutritional status of women in a rural area  
28 in Burkina Faso. *Eur J Clin Nutr* 2005;59 703-16.  
29
- 30  
31 32 15. Becquey E, Martin-Prevel Y. Micronutrient Adequacy of Women's Diet in Urban  
33 Burkina Faso Is Low. *J Nutr* 2010, 140 2079S-85S.  
34
- 35  
36 37 16. Cohen M, Fabri M, Cai X, et al. Prevalence and Predictors of Posttraumatic  
38 Stress Disorder and Depression in HIV-Infected and At-Risk Rwandan Women. *J*  
39 *Womens Health* 2009;18 1783-1791.  
40
- 41  
42 43 17. Weiser SD, Leiter K, Bangsberg DR, et al. Food insufficiency is associated with  
44 high-risk sexual behavior among women in Botswana and Swaziland. *PLoS Med*  
45 2007; 4 1589-97.  
46  
47
- 48  
49 50 18. Coates J, Swindale A, Bilinsky P. Household Food Insecurity Access Scale  
51 (HFIAS) for Measurement of Household Food Access: Indicator Guide in Food  
52 and Nutrition Technical Assistance Project 2007, Academy for Educational  
53 Development: Washington, D.C.  
54  
55  
56  
57  
58  
59  
60

- 1  
2  
3 19. Swindale A, Bilinsky P. Household Dietary Diversity Score (HDDS) for  
4 Measurement of Household Food Access: Indicator Guide in Food and Nutrition  
5 Technical Assistance Project (FANTA )2006, Academy for Educational  
6 Development: Washington DC.  
7  
8  
9  
10
- 11 20. Becquey E, Martin-Prevel Y, Traissac P, et al. The Household Food Insecurity  
12 Access Scale and an Index-Member Dietary Diversity Score Contribute Valid and  
13 Complementary Information on Household Food Insecurity in an Urban West-  
14 African Setting. J Nutr 2010;140 2233 -2240.  
15  
16  
17  
18  
19
- 20 21. The World Bank. Poverty, 2010. The World Bank.  
21  
22
- 23 22. The Millennium Development Goals Report, 2009, Department of Economic and  
24 Social Affairs: New York.  
25  
26
- 27 23. Braine T. Reaching Mexico's poorest. Bull World Health Organ 2006; 84 592-  
28 593.  
29  
30
- 31 24. Laterveer L, Niessen L, Yazbeck AS. Pro-poor health policies in poverty  
32 reduction strategies. Health Policy and Planning 2003;18 138 -145.  
33  
34
- 35 25. Nguyen P, Bich Hanh D, Lavergne MR, et al, The effect of a poverty reduction  
36 policy and service quality standards on commune-level primary health care  
37 utilization in Thai Nguyen Province, Vietnam. Health Policy and Planning 2010;25  
38 262 -271.  
39  
40  
41  
42  
43
- 44 26. Dodd R, Hinshelwood E, Harvey C. Poverty Reduction Strategy Papers: Their  
45 Significance for Health in Second Synthesis Report 2004, World Health  
46 Organization.  
47  
48  
49
- 50 27. Citro CF, Michael RT, eds: Measuring Poverty: A New Approach, 1995, National  
51 Academy Press: Washington DC.  
52  
53  
54  
55  
56  
57  
58  
59  
60

- 1
  - 2
  - 3
  - 4
  - 5
  - 6
  - 7
  - 8
  - 9
  - 10
  - 11
  - 12
  - 13
  - 14
  - 15
  - 16
  - 17
  - 18
  - 19
  - 20
  - 21
  - 22
  - 23
  - 24
  - 25
  - 26
  - 27
  - 28
  - 29
  - 30
  - 31
  - 32
  - 33
  - 34
  - 35
  - 36
  - 37
  - 38
  - 39
  - 40
  - 41
  - 42
  - 43
  - 44
  - 45
  - 46
  - 47
  - 48
  - 49
  - 50
  - 51
  - 52
  - 53
  - 54
  - 55
  - 56
  - 57
  - 58
  - 59
  - 60
28. UBOS & ORC Macro. Uganda Demographic and Health Survey 2000-2001, 2001, Uganda Bureau of Statistics and ORC Macro: Calverton, Maryland, USA.
29. [http://www.who.int/substance\\_abuse/publications/alcohol\\_gender\\_drinking\\_problem.pdf#page=200](http://www.who.int/substance_abuse/publications/alcohol_gender_drinking_problem.pdf#page=200). Assessed on 02/04/2012.
30. [http://www.who.int/substance\\_abuse/publications/en/rwanda.pdf](http://www.who.int/substance_abuse/publications/en/rwanda.pdf). Accessed on 11/20/2011.
31. World Bank. Education in Rwanda: rebalancing resources to accelerate post-conflict development and poverty reduction, in A World Bank country study 2004, The International Bank for Reconstruction and Development / The World Bank.
32. Rao N. Land rights, gender equality and household food security: Exploring the conceptual links in the case of India. Food Policy 2006;31 180-193.
33. World Bank, World Development Report 2008: Agriculture for Development, 2008, The International Bank for Reconstruction and Development / The World Bank.
34. Maxwell D. Alternative food security strategy: A household analysis of urban agriculture in Kampala. World Development 1995;23 1669-1681.

STROBE Statement—Checklist of items that should be included in reports of *cross-sectional studies*

|                              | Item No | Recommendation                                                                                                                                                                                                                                                                                                                                                                                                |
|------------------------------|---------|---------------------------------------------------------------------------------------------------------------------------------------------------------------------------------------------------------------------------------------------------------------------------------------------------------------------------------------------------------------------------------------------------------------|
| <b>Title and abstract</b>    | 1       | (a) Indicate the study's design with a commonly used term in the title or the abstract<br>(b) Provide in the abstract an informative and balanced summary of what was done and what was found                                                                                                                                                                                                                 |
| <b>Introduction</b>          |         |                                                                                                                                                                                                                                                                                                                                                                                                               |
| Background/rationale         | 2       | Explain the scientific background and rationale for the investigation being reported                                                                                                                                                                                                                                                                                                                          |
| Objectives                   | 3       | State specific objectives, including any prespecified hypotheses                                                                                                                                                                                                                                                                                                                                              |
| <b>Methods</b>               |         |                                                                                                                                                                                                                                                                                                                                                                                                               |
| Study design                 | 4       | Present key elements of study design early in the paper                                                                                                                                                                                                                                                                                                                                                       |
| Setting                      | 5       | Describe the setting, locations, and relevant dates, including periods of recruitment, exposure, follow-up, and data collection                                                                                                                                                                                                                                                                               |
| Participants                 | 6       | (a) Give the eligibility criteria, and the sources and methods of selection of participants                                                                                                                                                                                                                                                                                                                   |
| Variables                    | 7       | Clearly define all outcomes, exposures, predictors, potential confounders, and effect modifiers. Give diagnostic criteria, if applicable                                                                                                                                                                                                                                                                      |
| Data sources/<br>measurement | 8*      | For each variable of interest, give sources of data and details of methods of assessment (measurement). Describe comparability of assessment methods if there is more than one group                                                                                                                                                                                                                          |
| Bias                         | 9       | Describe any efforts to address potential sources of bias                                                                                                                                                                                                                                                                                                                                                     |
| Study size                   | 10      | Explain how the study size was arrived at                                                                                                                                                                                                                                                                                                                                                                     |
| Quantitative variables       | 11      | Explain how quantitative variables were handled in the analyses. If applicable, describe which groupings were chosen and why                                                                                                                                                                                                                                                                                  |
| Statistical methods          | 12      | (a) Describe all statistical methods, including those used to control for confounding<br>(b) Describe any methods used to examine subgroups and interactions<br>(c) Explain how missing data were addressed<br>(d) If applicable, describe analytical methods taking account of sampling strategy<br>(e) Describe any sensitivity analyses                                                                    |
| <b>Results</b>               |         |                                                                                                                                                                                                                                                                                                                                                                                                               |
| Participants                 | 13*     | (a) Report numbers of individuals at each stage of study—eg numbers potentially eligible, examined for eligibility, confirmed eligible, included in the study, completing follow-up, and analysed<br>(b) Give reasons for non-participation at each stage<br>(c) Consider use of a flow diagram                                                                                                               |
| Descriptive data             | 14*     | (a) Give characteristics of study participants (eg demographic, clinical, social) and information on exposures and potential confounders<br>(b) Indicate number of participants with missing data for each variable of interest                                                                                                                                                                               |
| Outcome data                 | 15*     | Report numbers of outcome events or summary measures                                                                                                                                                                                                                                                                                                                                                          |
| Main results                 | 16      | (a) Give unadjusted estimates and, if applicable, confounder-adjusted estimates and their precision (eg, 95% confidence interval). Make clear which confounders were adjusted for and why they were included<br>(b) Report category boundaries when continuous variables were categorized<br>(c) If relevant, consider translating estimates of relative risk into absolute risk for a meaningful time period |
| Other analyses               | 17      | Report other analyses done—eg analyses of subgroups and interactions, and sensitivity analyses                                                                                                                                                                                                                                                                                                                |



|                          |    |                                                                                                                                                                            |
|--------------------------|----|----------------------------------------------------------------------------------------------------------------------------------------------------------------------------|
| <b>Discussion</b>        |    |                                                                                                                                                                            |
| Key results              | 18 | Summarise key results with reference to study objectives                                                                                                                   |
| Limitations              | 19 | Discuss limitations of the study, taking into account sources of potential bias or imprecision. Discuss both direction and magnitude of any potential bias                 |
| Interpretation           | 20 | Give a cautious overall interpretation of results considering objectives, limitations, multiplicity of analyses, results from similar studies, and other relevant evidence |
| Generalisability         | 21 | Discuss the generalisability (external validity) of the study results                                                                                                      |
| <b>Other information</b> |    |                                                                                                                                                                            |
| Funding                  | 22 | Give the source of funding and the role of the funders for the present study and, if applicable, for the original study on which the present article is based              |

\*Give information separately for exposed and unexposed groups.

**Note:** An Explanation and Elaboration article discusses each checklist item and gives methodological background and published examples of transparent reporting. The STROBE checklist is best used in conjunction with this article (freely available on the Web sites of PLoS Medicine at <http://www.plosmedicine.org/>, Annals of Internal Medicine at <http://www.annals.org/>, and Epidemiology at <http://www.epidem.com/>). Information on the STROBE Initiative is available at [www.strobe-statement.org](http://www.strobe-statement.org).
